# Supplementary material for: Standard precaution practice and associated factors among health professionals working in Addis Ababa government hospitals, Ethiopia: a cross-sectional study using multilevel analysis
Source: PubMed Central journal article supplement — BMJ Open. 2019 Oct 14;9(10):e030784. doi: 10.1136/bmjopen-2019-030784 (PMC6797290; doi:10.1136/bmjopen-2019-030784), 2019-10-14
Supplement: bmjopen-2019-030784.draft_revisions.pdf [file bmjopen-2019-030784.draft_revisions.pdf]

# BMJ Open

BMJ Open is committed to open peer review. As part of this commitment we make the peer review history of every article we publish publicly available.

When an article is published we post the peer reviewers' comments and the authors' responses online. We also post the versions of the paper that were used during peer review. These are the versions that the peer review comments apply to.

The versions of the paper that follow are the versions that were submitted during the peer review process. They are not the versions of record or the final published versions. They should not be cited or distributed as the published version of this manuscript.

BMJ Open is an open access journal and the full, final, typeset and author-corrected version of record of the manuscript is available on our site with no access controls, subscription charges or pay-per-view fees (<http://bmjopen.bmj.com>).

If you have any questions on BMJ Open's open peer review process please email [info.bmjopen@bmj.com](mailto:info.bmjopen@bmj.com)

# BMJ Open

## Standard Precaution Practice and Associated Factors among Health Professionals Working in Addis Ababa Governmental Hospitals, Ethiopia: a cross-sectional questionnaire survey and Multilevel Analysis

|                               |                                                                                                                                                                                                                                                                                                                                                                                                                                                                                                                   |
|-------------------------------|-------------------------------------------------------------------------------------------------------------------------------------------------------------------------------------------------------------------------------------------------------------------------------------------------------------------------------------------------------------------------------------------------------------------------------------------------------------------------------------------------------------------|
| Journal:                      | <i>BMJ Open</i>                                                                                                                                                                                                                                                                                                                                                                                                                                                                                                   |
| Manuscript ID                 | bmjopen-2019-030784                                                                                                                                                                                                                                                                                                                                                                                                                                                                                               |
| Article Type:                 | Research                                                                                                                                                                                                                                                                                                                                                                                                                                                                                                          |
| Date Submitted by the Author: | 02-Apr-2019                                                                                                                                                                                                                                                                                                                                                                                                                                                                                                       |
| Complete List of Authors:     | Angaw, Dessie ; Institute of public health,college of medicine and health science , University of Gondar,Ethiopia, Department of Epidemiology and Bio statistics<br>Gezie, Lemma Derseh; Institute of Public Health, College of Medicine and Health Sciences, University of Gondar, Ethiopia, Department of Epidemiology and Biostatistics<br>Dachew, Berihun; Institute of Public Health, College of Medicine and Health Sciences, University of Gondar, Ethiopia, Department of Epidemiology and Bio statistics |
| Keywords:                     | EPIDEMIOLOGY, Health & safety < HEALTH SERVICES ADMINISTRATION & MANAGEMENT, Health policy < HEALTH SERVICES ADMINISTRATION & MANAGEMENT                                                                                                                                                                                                                                                                                                                                                                          |
|                               |                                                                                                                                                                                                                                                                                                                                                                                                                                                                                                                   |

SCHOLARONE™  
Manuscripts

1  
2  
3  
4  
5 **Standard Precaution Practice and Associated Factors among Health**  
6 **Professionals Working in Addis Ababa Governmental Hospitals,**  
7 **Ethiopia: A cross-sectional questionnaire survey and Multilevel**  
8 **Analysis**  
9  
10  
11  
12  
13  
14  
15  
16

17 Dessie Abebaw Angaw\*<sup>1</sup>, Lemma Dereseh Gezie<sup>1</sup>, Berihun Assefa Dachew<sup>1</sup>

18  
19 Address: [dessieabebaw96@gmail.com](mailto:dessieabebaw96@gmail.com), [lemmagezie@gmail.com](mailto:lemmagezie@gmail.com), [berihunassefa21@gmail.com](mailto:berihunassefa21@gmail.com)

20  
21 Phone number: +251912480696, +251918773355, +251911542348  
22  
23  
24

25 <sup>1</sup>department of Epidemiology and Biostatistics, Institute of Public Health, College of Medicine  
26 and Health Sciences, University of Gondar, Ethiopia  
27  
28  
29  
30  
31

32 **\*Corresponding author**  
33  
34  
35  
36  
37  
38  
39  
40  
41  
42  
43  
44  
45  
46  
47  
48  
49  
50  
51  
52  
53  
54  
55  
56  
57  
58  
59  
60

## ABSTRACT

**Objectives:** Occupational exposure to blood and body fluids is a major risk to transmission of infections for health care workers in developing countries like Ethiopia. The aim of this study was to assess standard precautions practice and its associated factors among health professionals working in Addis Ababa governmental hospitals.

**Methods:** cross-sectional study was conducted in 2015 among 360 males and 412 females from eight Addis Ababa governmental hospitals. Multistage sampling technique was used to select the study participants. Health professionals who were directly participating in screening, diagnosis; treatment and follow up of patients were included. To take into account the hierarchical structure of data, multilevel binary logistic regressions were used. The intra-class correlation coefficient was calculated to evaluate whether the variation in the scores is primarily within or between hospitals.

**Result:** Among health professionals 50.65% of them had good standard precaution practice. There is a variation in health professionals practice between hospitals (ICC=5.6%). At the individual level attitude, age and educational status were found to be much more important factors with standard precaution practice. Controlling individual level factors; applying regular observation (AOR: 1.82; 95% CI: 1.2 to 2.76), providing sufficient materials (AOR: 1.53; 95% CI: 1.03 to 2.28) and week response for reported incidences (AOR: 0.47; 95% CI: 0.30 to 0.8) were also associated factors at hospital level.

**Conclusion:** There is low practice of standard precautions in the health care setting that put patients and health professionals at significant risk of acquiring infections. This finding warrant working on both at hospital and individual level factors has a significant role to maintain optimal practice in the hospitals

**Key words:** - Health professionals, multilevel analysis, standard precaution practice

## ARTICLE SUMMARY

### Strengths and limitations of this study

- The strength of this study was having large sample size which increases the estimation power and
- Incorporating all levels/types of hospitals like (referral, general and specialized hospitals) in the Addis Ababa city
- Applying multilevel model analysis used to avoid atomistic and ecological fallacy.
- The limitation of this study was the possibility of response bias that they were likely to over report their practice

## BACKGROUND

Standard precaution is the basic minimum standard of hygiene to be applied throughout all contact with blood or body fluids from any patient or source regardless of diagnosis or infection status. Healthcare workers should apply the principles of standard precautions with each encounter with a patient and consider every person, patient or staff, as potentially infectious or susceptible to infection (1-4). It is designed for use in caring for all people both clients and patients attending healthcare facilities (5). Both those receiving and providing care in a hospital are at risk of acquiring and transmitting infections through exposure to blood, body fluids or contaminated materials (6, 10).

Health care workers are exposed to blood and other body fluids while they perform their activities. Among the 35 million health workers worldwide, about 3 million receive percutaneous exposures to blood borne pathogens each year; two million of those to HBV, 0.9 million to HCV and 170 000 to HIV. These injuries may result in 15 000 HCV, 70 000 HBV and 500 HIV infections. More than 90% of these infections occur in developing countries(7).

Hospital level factors have a significant impact of occupational exposure on health care professionals. For example, a study done SaoPaulo revealed that an institutional factor has significant association on standard precaution practice. Eighty eight percent (88%) of health professionals those who was supported and got frequent feedback on safety by the institution management had compliance on standard precaution practice with AOR 3. 49 compared to poor management support and infrequent feedback on safety practice respectively (23)

Although minimal data is available on the prevalence of health care acquired infection in Ethiopian hospitals, in developing countries with health systems and resources similar to Ethiopia,

1  
2  
3 studies have shown HCAI rates as high as 40% (4). In Ethiopia, there is dramatic increase in the  
4  
5 development of health facilities, but less emphasis is given for preventing occupational exposures  
6  
7 that still the prevalence is high. For example, a study in Direa Dawa and Harari in 2010 the  
8  
9 prevalence of splashing of blood or body fluids to the mouth or eyes was 28.8% (10).

10  
11  
12  
13 Though few researches exist in Ethiopia on standard precautions practice, still they did not address  
14  
15 on identifying the factors at individual and hospitals level using a single analytical framework to  
16  
17 provide reliable information. In this context, therefore, real information from both levels was  
18  
19 required to enable Health Care Workers and to design more effective strategies for increasing  
20  
21 compliance of standard precaution practices and to prevent transmissions of infectious diseases in  
22  
23 the health care setting.  
24  
25

26  
27  
28 The aim of the current study was to assess standard precaution practice and its associated factors  
29  
30 among health professionals working in Addis Ababa governmental hospitals, Ethiopia  
31  
32  
33  
34  
35  
36  
37  
38  
39  
40  
41  
42  
43  
44  
45  
46  
47  
48  
49  
50  
51

## 52 **METHODS**

## **Study setting, study design, participants and sampling procedure**

Institutional based cross-sectional study was conducted from March 22 to April 23, 2015 in Addis Ababa governmental hospitals. All health professionals who were working in the 8 selected Hospitals and those who were participating in screening, diagnosis, treatment and follow up of patients were included in the study. The sample size was calculated using single population formula for descriptive part and double population proportion formula for associated factors. Multistage sampling technique with design effect two was used to select 866 study participants with simple random sampling method.

## **Data collection tools, quality control issues and study variables**

Closed ended self-administered questions were used which was adapted from different literatures and Ethiopian Hospital Reform Implementing Guideline (EHRIG) to collect information on socio demographic characteristic, knowledge, attitudes and institutional factors of standard precautions practice. Eight BSc nurse data collectors' and two supervisors (health officers) were assigned for data collection.

The questions were first prepared in English language then translated to Amharic then back translated to English to keep its consistency. Pretest was conducted on 44 respondents (5% of total sample size) before five days of data collection in governmental non selected hospitals (Gandhi and Alert hospitals) and necessary correction was taken after the pretest done on the questionnaires. There were half day training for data collectors and supervisors on how to collect data. Before the respondents respond to the questions orientation was given to fill the questions. The collected data was checked by the principal investigator and the supervisors for its completeness.



1  
2  
3 The study variables included were individual level variables such as socio-demographic  
4 characteristics, knowledge and attitude of the respondents and hospital level variables such as  
5 frequent observation, hospital category (general, special and referral hospital) and self-reported  
6 practice on standard precaution.  
7  
8  
9  
10  
11

### 12 **Patient and Public Involvement**

13  
14  
15 Patients and the public were not involved in the design and conception of the study and there are  
16 no plans to disseminate the results to patients.  
17  
18  
19

### 20 **Data management and analysis**

21  
22  
23 The respondents were asked 30 questions which were graded by assigning scores to likert scale  
24 responses on a Scale of 0–5 points to assess the overall standard precaution practice. The total  
25 mean score was used to measure the standard precaution practice. Those health professionals who  
26 scored less than the total score mean value were considered as having poor SPP and health  
27 professionals who scored greater than or equal to the total score mean value were considered as  
28 having good SPP. After appropriate coding, the data was entered using Epi Info version 7 software  
29 and it was exported to STATA version 12 software for analysis.  
30  
31  
32  
33  
34  
35  
36  
37  
38  
39

40  
41 Using a two-level binary logistic regression modeling, we examined the effect of a number of  
42 individual and hospital level variables. Descriptive analyses was involved the use of numbers and  
43 percentage for variables to show the distribution of the outcome variables by the associated  
44 variables.  
45  
46  
47  
48  
49

50  
51 Three models were constructed for the analysis. The first model, an empty model without any  
52 explanatory variable. The second model control for the individual-level variables, while the third  
53  
54  
55  
56  
57

1  
2  
3 control for both the individual- and hospital -level variables simultaneously. p -value of <0.05  
4  
5 was used to define statistical significance.  
6  
7

8  
9 The Deviance Information Criterion (DIC) was used as a measure of how well our different models  
10 fitted the data. The intra-class correlation coefficient (Rho) was calculated to evaluate whether the  
11 variation in the scores is primarily within or between the hospitals.  
12  
13

## 14 **Ethical considerations**

15  
16  
17 Ethical clearance was obtained from the ethical committee of institution of public health, college  
18 of medicine and health science, and university of Gondar. Official letters was given to the ministry  
19 of health, Addis Ababa health office and the selected hospitals. The purpose and importance of  
20 this study was explained for each participant, written informed consent was taken from each study  
21 participant before they fill the questionnaire, and participants' involvement was assured on  
22 voluntary bases. Participants who were unwilling to participate and want to abstain at any step of  
23 filling the questionnaire in the study were informed to do so without any restriction. Name was not  
24 writing on the questionnaire and the confidentiality of the data has been kept at all level of the  
25 study.  
26  
27  
28  
29  
30  
31  
32  
33  
34  
35  
36  
37  
38  
39  
40  
41  
42  
43  
44  
45  
46  
47  
48  
49  
50  
51  
52  
53  
54  
55  
56  
57  
58  
59  
60

## RESULT

### Socio demographic characteristics of the respondents

A total of 772 study participants were participated in this study with 89.2% response rate. Majority of respondents were nurses (54.4%) and more than half 397 (51.42%) of the respondents were BSc health professionals. The mean age and working experience of respondents was 29.63 years (SD=±6.95years) and 6.04 years (SD=±6.02 years) respectively (table1).

Table 1 Socio-demographic characteristics of health professionals in Addis Ababa governmental hospitals (n=772), 2015

| Variable                       | Frequency | percentage |
|--------------------------------|-----------|------------|
| <b>age cat</b>                 |           |            |
| 20-29                          | 400       | 51.81      |
| 30-39                          | 300       | 38.86      |
| 40-49                          | 42        | 5.44       |
| 50-59                          | 30        | 3.89       |
| <b>Sex</b>                     |           |            |
| male                           | 360       | 46.63      |
| female                         | 412       | 53.37      |
| <b>Profession</b>              |           |            |
| Nurse                          | 420       | 54.4       |
| Doctors***                     | 149       | 19.18      |
| Laboratory                     | 69        | 8.94       |
| Health officer                 | 54        | 6.99       |
| midwife                        | 39        | 5.05       |
| Psychiatry                     | 20        | 2.72       |
| Anesthesiology                 | 21        | 2.72       |
| <b>Work experience in year</b> |           |            |
| <1                             | 18        | 2.33       |
| 1-5                            | 457       | 59.2       |
| 6-10                           | 215       | 27.85      |
| >10                            | 82        | 10.62      |
| <b>Marital status</b>          |           |            |
| Married                        | 287       | 37.18      |
| Single                         | 466       | 60.36      |
| others**                       | 19        | 2.46       |

\* Assistance nurse\*\* widowed, separated and divorced . \*\*\* Specialists and medical doctor

### Standard precaution practice

Good standard precaution practice (SPP) among health professionals working in Addis Ababa hospitals were 50.65 % (95% CI: 46.1, 53.9). From SPP elements only safe injection management was practiced above half (fig.1).

Concerning hand washing practice after any direct contact with patients 57.6% were always practicing, 28.24% often practicing, 8.7% some times, 2.9% seldom and 2.5% respondents were never practicing. On the top of this, only 59.2% respondents were always practicing waste disposal on coded waste bin accordingly.

In the intercept model (null model) analysis the result indicated that there was considerable heterogeneity between hospitals. The intra-class correlation in the null model for standard precaution practice indicated that 5.6 % of the total variance can be attributed to differences between hospitals (table2).

Table 2: Parameter coefficients of the null model in using hospital, Addis Ababa (2015)

| Random effect                   | Estimate | 95 % conf. interval |
|---------------------------------|----------|---------------------|
| Level 2 variance - var (cons)   | 0.19*    | (0.055,0.66)        |
| Rho-intra-class correlation (%) | 5.6      |                     |
| Deviance                        | 1052     |                     |

\*significance

In the model 3 when both individual level and hospital level variables added together ;health professionals aged 40-49 were more likely to practice standard precautions (OR=2.98; 95% CI=1.05-7.25), as compared with the youngest health professionals (aged 20-29). The odds of practicing standard precaution practice for BSc health professionals were decreased by 38 % as compared to diploma health professionals (OR =0.62; 95% CI; 0.4-0.9). The odds of developing good Standard precaution practice among health professionals who have positive attitude were 8.12 times higher as compared to health professionals who had negative attitude towards SPP (table3).

On the other hand, specialists which were significant variables at individual level become insignificant variables when added together with hospital level variables as compared with diploma (table 3)

Table 3 Multilevel multivariable Logistic Regression Modeling of Factors Associated with standard precaution practice among health professionals working in Addis Ababa governmental hospitals, 2015

| Variables                | Model 1 a<br>OR (CI 95%) | Model 2b<br>OR (CI 95%) | Model 3c(full model)<br>OR (CI 95%) |
|--------------------------|--------------------------|-------------------------|-------------------------------------|
| <b>Age category</b>      |                          |                         |                                     |
| 20-29                    |                          | 1                       | 1                                   |
| 30-39                    |                          | 2.00 (1.33-3.02)**      | 1.94 (1.2-2.9)**                    |
| 40-49                    |                          | 3.43 (1.33-8.83)*       | 2.98 (1.05-7.25)*                   |
| 50-59                    |                          | 5.17 (1.56-16.72)**     | 4.57(1.3-15.5)*                     |
| <b>Educational level</b> |                          |                         |                                     |
| Diploma                  |                          | 1                       | 1                                   |
| Degree                   |                          | 0.63 (0.44-0.91)*       | 0.62 (0.4-0.9)*                     |
| Masters                  |                          | 0.46 (0.27-0.78)**      | 0.5(0.27-0.86)*                     |
| Specialist               |                          | 0.19 (0.05-0.76)*       | 0.25(0.06-1.05)                     |
| Others                   |                          | 0.21( 0.01-2.54)        | 0.25(0.02-3.4)                      |
| <b>Knowledge</b>         |                          |                         |                                     |
| Poor                     |                          | 1                       | 1                                   |
| Medium                   |                          | 1.4(0.88-2.25)          | 1.47 (0.9-2.3)                      |
| High                     |                          | 1.43(0.85-2.4)          | 1.52(0.9-2.6)                       |
| <b>Attitude</b>          |                          |                         |                                     |
| Negative                 |                          | 1                       | 1                                   |
| Neutral                  |                          | 3.25 (2.02-5.26)***     | 3.04 (1.9-4.96)***                  |
| Positive                 |                          | 8.4(4.46-15.73)***      | 8.12 (4.25-15.53)***                |

Table 3( continued)

**HOSPITAL LEVEL VARIABLE**

|                                                                    |                        |                        |                       |
|--------------------------------------------------------------------|------------------------|------------------------|-----------------------|
| Provide safety box and waste bin adequately                        |                        |                        | 1.01(0.9-1.03)        |
| Do not give solution for incidents which were reported             |                        |                        | 0.49(0.3-0.8)**       |
| Allocate budget for SPP activities                                 |                        |                        | 1.02(0.66-1.57)       |
| Provide materials for SPP activities                               |                        |                        | 1.5(1.03-2.27)*       |
| Management give feedback by regular observation                    |                        |                        | 1.82(1.2-2.74)**      |
| Management give feedback by giving immediate response for problems |                        |                        | 1.45 (0.86-2.40)      |
| Facilitate health professionals and experts to post safety symbols |                        |                        | 0.82 (0.49-1.35)      |
| <b>Standard of the hospital</b>                                    |                        |                        |                       |
| General hospital                                                   |                        |                        | 1                     |
| Specialized hospital                                               |                        |                        | 2.35(1.44-3.8)*       |
| Referral hospital                                                  |                        |                        | 1.01(0.64-1.58)       |
| <b>Random effect</b>                                               | <b>Model 1</b>         | <b>Model 2</b>         | <b>Model 3</b>        |
| Hospital level variance                                            | <b>0.19(0.06,0.66)</b> | <i>0.13(0.03,0.57)</i> | <i>0.14(0.03-0.6)</i> |
| <b>Model fit statistics</b>                                        |                        |                        |                       |
| Deviance                                                           | 1052                   | 958                    | 902                   |
| AIC                                                                | 1055                   | 1002                   | 970                   |

\*P<0.05 \*\* P<0.01 \*\*\* P<0.001

- SPP=standard precaution practice, OR = odd ratio CI= confidence interval, a = there is no independent variable in the model, b= only individual level variables included in the model, c=all level variables included in the model

## DISCUSSION

The current study found that 50.7 % of the health professionals had good standard precaution practice. This is in line with the study done in Nigeria health care workers (46.8%) (13). But, it was better practiced than a study done in northern Ethiopia (42.9%). This may be due to difference in attitude of individuals towards standard precaution practice (SPP) and availability of facilities.

On the other hand, it is lower than a study done in eastern Ethiopia (80%). The possible explanation would be due to different the study participants that the eastern Ethiopia study incorporates both hospital and health center workers. The possible explanation would be due to different data collection tools used and the study participants who were included from health center and hospitals (10)

For the prevention of potential exposure to blood and other body fluids depend on the type of procedures and personal protective equipments availability (4, 10). In this study 61.5% health professionals were always change gloves between patient contacts. This finding were lower than a study done in Nigeria (72.4%)(12). This difference may be due to negligence of health professionals and availability of gloves in this study area.

The study found out 21.1% of the health professionals always recapped used needles. This finding was relatively similar with the previous study done in Northern Ethiopia in which 17 % of health professionals recapped used needles (14). Even if this figure was lower than previous study in Nigeria (36.7%) (13), it is risky in exposing health professional to infectious diseases like HIV and HBV.

Public concern has been growing over the disposal of wastes produced by health care facilities in the world(20). The study found that 53.3 % of health professionals were never dispose of waste into an already full receptacle. This poor practice of waste segregation may be due to inadequate availability of waste bin and negligence of health professionals for their safety.



1  
2  
3 At the individual level, variables like attitude, education and age were found to be much more  
4 important associated variables to develop standard precaution practice. This finding indicated that,  
5 health professional that had positive attitude was 8.1 times more likely to develop good SPP as  
6 compared to those respondents who had negative attitude keeping other variables constant. Similar  
7 studies found that attitude has positive association for SPP (15, 19).  
8  
9

10  
11  
12 Our study revealed that, practicing standard precaution among degree holders were decreased by  
13 50% as compared to diploma health professionals. This indicated that the better educational status  
14 had developed lower standard precaution practice. This may due to the higher education level  
15 health professionals ignore standard precaution practice or they gave priority to their patients other  
16 than their safety. On the other hand, older health professionals had better standard precaution  
17 practice as compared to the youngest health professionals (aged 20-29). This finding was in  
18 contrast to other similar study (23). The possible explanation would be the knowledge of youngest  
19 health professionals may not be supported by skill in our study setting.  
20  
21  
22  
23  
24  
25  
26

27 The odds of developing good practice by health professional for those hospitals that did not give  
28 response for reported incidents was decreased by 51 % as compared to those hospitals gave  
29 immediate solution for reported incidents. Whereas the odds of developing standard precaution  
30 practice by health professionals working in a hospital that perform observation with feedback for  
31 activities related to SPP was increased by 82 % as compared to counterpart. This study was  
32 supported by other similar study (AOR: 3.49) (23).  
33  
34  
35  
36  
37

38 Health professionals working in hospitals having different characteristics had different practices.  
39 The odds of developing standard precaution practice by health professionals working in  
40 specialized hospital were 2.4 times higher than health professionals working in general hospitals  
41 with the same value of random effect. The possible explanation could be the difference in  
42 availability of materials and burden of acute cases in general hospital. On the top of this, it would  
43 be the presence of shift their working place (ward) in general hospitals, which may affect following  
44 some standard precaution guide lines. The strength of this study was having large sample size  
45 which increases the estimation power and multilevel model analysis used to avoid atomistic and  
46 ecological fallacy. On the contrary, the limitation of this study was the possibility of response bias  
47 that they were likely to over report their practice. Follow up observation of all respondents would  
48 be more accurate and informative to cross check self-reported findings.  
49  
50  
51  
52  
53  
54  
55  
56  
57

1  
2  
3 In conclusion the standard precaution practice was found to be low in the health care setting that  
4 increasing the likelihood of acquiring risk of nosocomial infections. Variables like age, educational  
5 status and attitude were factors associated with standard precaution practice at the individual level  
6 and frequent observation, the absence of immediate response for reported incidents, providing  
7 materials and hospital standards were significant factors associated with SPP at hospital level.  
8  
9  
10  
11  
12  
13  
14  
15  
16  
17  
18  
19  
20  
21  
22  
23  
24  
25  
26  
27  
28  
29  
30  
31  
32  
33  
34  
35  
36  
37  
38  
39  
40  
41  
42  
43  
44  
45  
46  
47  
48  
49  
50  
51  
52  
53  
54  
55  
56  
57  
58  
59  
60

For peer review only

### **Competing interest**

No potential conflict of interests with respect to the research, authorship and/or publication of this article.

### **Availability of data and material**

All data generated or analyzed during this study are included in this published article. The data sets used and/or analyzed during the current study are available from the corresponding author on reasonable request

### **Authors' contribution**

DA conceived the study ideas, design, analyzed data and wrote the draft manuscript; LD and BA participated in the study design, edited the manuscript and contributed to the final analysis. All authors read and approved the final manuscript.

### **Authors' Information**

All authors are public health specialists.

### **Acknowledgments**

We would like to thank the University of Gondar for ethical approval. We also like to extend our appreciation to data collectors and the study participants for their devoted cooperation.

### **Funding**

This research work was funded by Amanuel Mental Specialized Hospital and University of Gondar.

### **Ethics approval**

Ethical committee of institution of public health, college of medicine and health science, and university of Gondar

## References

1. Stokes L. Infection Prevention Policy Standard Precautions Policy 2012.
2. Health service executes. Standard precaution guideline. 2009.
3. Katherine H, Murray L. Standard precautions a new approach to reducing infection transmission in the hospital setting. *Journal of intravenous nursing*. 1997;20(65).
4. Minister of Health. Ethiopian hospital reforming implementation guideline 2010.
5. Infection Control Steering Committee. Australian guidelines for the prevention and control of infection in health care. 2010.
6. JHPIEGO. Infection Prevention Guidelines for Healthcare Facilities with Limited Resources. 2003.
7. World health organization. Health care worker safety. 2005.
8. Elise M. Beltrami, Ian T. Williams, Craig N. Shapiro, Mary E. Chamberland. Risk and Management of Blood-Borne Infections in Health Care Workers. *Clinical microbiology reviews*. 2000, ;13(3).
9. Mukherjee S, Bhattacharyya A, SharmaSarkar B, Goswami DN, Ghosh S, Samanta A. Knowledge and Practice of Standard Precautions and Awareness Regarding Post-Exposure Prophylaxis for HIV among Interns of a Medical College in West Bengal, India. *Oman medical journals*. 2013;28(2):5.
10. Ayalu A. Reda, Shiferaw Fisseha, Bezatu Mengistie, Jean-Michel Vandeweerd. Standard Precautions: Occupational Exposure and Behavior of Health Care Workers in Ethiopia. *PLoS ONE*. 2010;5(12).
11. Jane D. Siegel, Emily Rhinehart, Marguerite Jackson, Linda Chiarello. *Guideline for Isolation Precautions: Preventing Transmission of Infectious Agents in Healthcare Settings*. 2007.

- 1  
2  
3 12. OE Amoran, OO Onwube. Infection Control and Practice of Standard Precautions Among  
4  
5 Healthcare Workers in Northern Nigeria. *Journal of infectious disease* 2013;5(4):156-63.  
6
- 7  
8 13. Tobin Ekaete Alice, Asogun Danny Akhere, Odia Ikponwonsa, Ehidiamhen Grace.  
9  
10 Knowledge and practice of infection control among health workers in a tertiary hospital in Edo  
11  
12 state,Nigeria. *Direct Research Journal of Health and Pharmacology (DRJHP)*. 2013;1 (2):20-  
13  
14 7.  
15
- 16  
17 14. Azeb Gebresilassie, Abera Kumei, Dejen Yemane. Standard Precautions Practice among  
18  
19 Health Care Workers in Public Health Facilities of Mekelle Special Zone, Northern Ethiopia.  
20  
21 *Community Medicine & Health Education*. 2014;4(3).  
22
- 23  
24 15. Kandis V. Garland, . A Survey of United States Dental Hygienists' Knowledge, Attitudes, and  
25  
26 Practices with Infection Control Guidelines. *The Journal of Dental Hygiene*. 2013;87(3).  
27
- 28  
29 16. Mukherjee S, Bhattacharyya A, SharmaSarkar B, Goswami DN, Ghosh S, Samanta A.  
30  
31 Knowledge and Practice of Standard Precautions and Awareness Regarding Post-Exposure  
32  
33 Prophylaxis for HIV among Interns of a Medical College in West Bengal, India. *Oman Medical*  
34  
35 *Journal* 2013;28(2):141-5.  
36
- 37  
38 17. Ramesh holla, tanuj kanchan, nithin kumar, bunnikrishnan, rekhat, prasanna mithra, et al.  
39  
40 Perception and practice of standard precautions among health care professionals at tertiary care  
41  
42 hospitals in coastal South India. *Asian J Pharm Clin Res*. 2014;7(2):101-4.  
43
- 44  
45 18. Beghdadli, Belhadj Z, Chabane W, Ghomari O, Kandouci ABF, anello S. Standard  
46  
47 precautions" practices among nurses in a university hospital in Western Algeria. *US national*  
48  
49 *library of medicine*. 2008;20(5).  
50
- 51  
52 19. Najeeb N. Knowledge of standard and transmission based precautions in tertiary and  
53  
54 secondary health care settings of maldavies ,India. 2007.  
55  
56  
57

- 1  
2  
3 20. World health organization. Safe management of wastes from healthcare activities. 2014.
- 4  
5 21. Berhanu Elfu Feleke. Prevalence and determinant factors for sharp injuries among Addis  
6 Ababa hospital health professionals. *Journal of Public Health*. 2013;1(5):189-93.
- 7  
8 22. Ameneh Barikani. Knowledge, Attitude and Practice towards Standard Isolation Precautions  
9 among Iranian Medical Students. *Global Journal of Health Science* 2012;4(2).
- 10  
11 23. Adriana Maria da Silva Felix, Elivane Victor, Silmara Elaine Tofano Malaguti, Elucir Gir.  
12 Individual, work-related and institutional factors associated with adherence to standard  
13 precautions. *Journal of infection control*. 2013;2(2):106-11.
- 14  
15 24. Enwere OO, Diwe KC. Knowledge, perception and practice of injection safety and healthcare  
16 waste management among teaching hospital staff in Southeast Nigeria: an intervention study.  
17 *Pan African Medical Journal*. 2014;17(218).
- 18  
19 25. Li Li, Chunqing Lin, Zunyou Wu, Jihui Guan, Manhong Jia, Zhihua Yan. HIV-Related  
20 Avoidance and Universal Precaution in Medical Settings: Opportunities to Intervene. *Health  
21 Services Research*2011;46(2).
- 22  
23 26. TM Foster, MG Lee, CD McGaw, Frankson M. Knowledge and practice of occupational  
24 infection control among healthcare workers in Jamaica. *West Indian medical journal*  
25 2010;59(2).
- 26  
27 27. J.Farley, C. Tudor, M. Mphahlele†, K. Franz, N. A. Perrin, S. Dorman, et al. A national  
28 infection control evaluation of drug-resistant tuberculosis hospitals in South Africa. *NIH  
29 Public Access*. 2012 16(1).
- 30  
31 28. Eman M.Mortada, Marwa M. Zalut. Assessment of compliance to standard precautions among  
32 surgeons in Zagazig University Hospitals, Egypt, using theHealth Belief Model. *Journal of the  
33 Arab Society for Medical Research*. 2013;9:6-14.
- 34  
35  
36  
37  
38  
39  
40  
41  
42  
43  
44  
45  
46  
47  
48  
49  
50  
51  
52  
53  
54  
55  
56  
57

- 1  
2  
3 29. Adinma ED, Ezeama C, Adinma JI, Asuzu MC. Knowledge and practice of universal  
4 precautions against blood borne pathogens amongst house officers and nurses in tertiary health  
5 institutions in Southeast Nigeria. NCBI US national library of medicine. 2009;12(4):398-402.  
6  
7  
8  
9  
10 30. Stephen Obekpa Abah, Elijah Ige Ohimain. Healthcare waste management in Nigeria: A case  
11 study. Journal of Public Health and Epidemiology. 2011;3(3):99-110.  
12  
13  
14  
15 31. Ministry of Health Malaysia. Policies And Procedures for Infection Control 2010.  
16  
17  
18  
19  
20  
21  
22  
23  
24  
25  
26  
27  
28  
29  
30  
31  
32  
33  
34  
35  
36  
37  
38  
39  
40  
41  
42  
43  
44  
45  
46  
47  
48  
49  
50  
51  
52  
53  
54  
55  
56  
57  
58  
59  
60

1  
2  
3 Figure  
4  
5

6 Figure 1 percentage of standard precaution practices among health professionals working Addis  
7 Ababa governmental hospitals, 2017  
8  
9  
10  
11  
12  
13  
14  
15  
16  
17  
18  
19  
20  
21  
22  
23  
24  
25  
26  
27  
28  
29  
30  
31  
32  
33  
34  
35  
36  
37  
38  
39  
40  
41  
42  
43  
44  
45  
46  
47  
48  
49  
50  
51  
52  
53  
54  
55  
56  
57  
58  
59  
60

For peer review only



1  
2  
3  
4  
5  
6  
7  
8  
9  
10  
11  
12  
13  
14  
15  
16  
17  
18  
19  
20  
21  
22  
23  
24  
25  
26  
27  
28  
29  
30  
31  
32  
33  
34  
35  
36  
37  
38  
39  
40  
41  
42  
43  
44  
45  
46  
47  
48  
49  
50  
51  
52  
53  
54  
55  
56  
57  
58  
59  
60

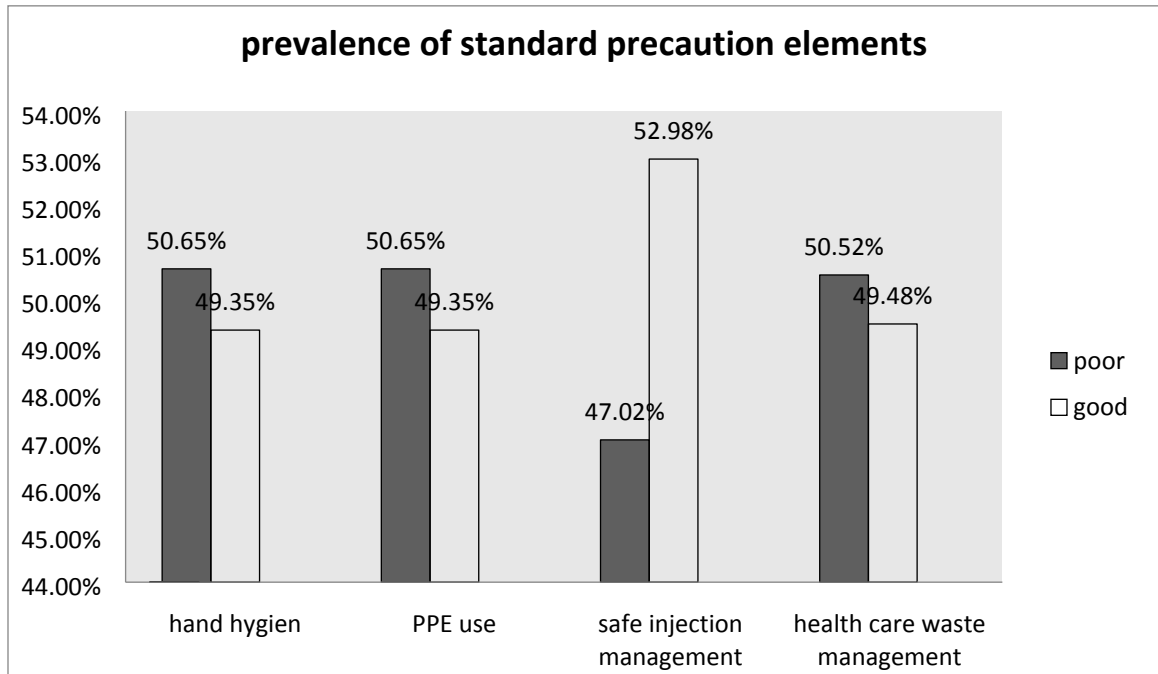

# BMJ Open

## Standard Precaution Practice and Associated Factors among Health Professionals Working in Addis Ababa Governmental Hospitals, Ethiopia: A cross-sectional study using Multilevel Analysis

|                                 |                                                                                                                                                                                                                                                                                                                                                                                                                                                                                                                   |
|---------------------------------|-------------------------------------------------------------------------------------------------------------------------------------------------------------------------------------------------------------------------------------------------------------------------------------------------------------------------------------------------------------------------------------------------------------------------------------------------------------------------------------------------------------------|
| Journal:                        | <i>BMJ Open</i>                                                                                                                                                                                                                                                                                                                                                                                                                                                                                                   |
| Manuscript ID                   | bmjopen-2019-030784.R1                                                                                                                                                                                                                                                                                                                                                                                                                                                                                            |
| Article Type:                   | Research                                                                                                                                                                                                                                                                                                                                                                                                                                                                                                          |
| Date Submitted by the Author:   | 15-Aug-2019                                                                                                                                                                                                                                                                                                                                                                                                                                                                                                       |
| Complete List of Authors:       | Angaw, Dessie ; Institute of public health,college of medicine and health science , University of Gondar,Ethiopia, Department of Epidemiology and Bio statistics<br>Gezie, Lemma Derseh; Institute of Public Health, College of Medicine and Health Sciences, University of Gondar, Ethiopia, Department of Epidemiology and Biostatistics<br>Dachew, Berihun; Institute of Public Health, College of Medicine and Health Sciences, University of Gondar, Ethiopia, Department of Epidemiology and Bio statistics |
| <b>Primary Subject Heading</b>: | Health services research                                                                                                                                                                                                                                                                                                                                                                                                                                                                                          |
| Secondary Subject Heading:      | Infectious diseases                                                                                                                                                                                                                                                                                                                                                                                                                                                                                               |
| Keywords:                       | EPIDEMIOLOGY, Health & safety < HEALTH SERVICES ADMINISTRATION & MANAGEMENT, Health policy < HEALTH SERVICES ADMINISTRATION & MANAGEMENT                                                                                                                                                                                                                                                                                                                                                                          |
|                                 |                                                                                                                                                                                                                                                                                                                                                                                                                                                                                                                   |

SCHOLARONE™  
Manuscripts

1  
2  
3 **Standard Precaution Practice and Associated Factors among Health**  
4 **Professionals Working in Addis Ababa Governmental Hospitals,**  
5 **Ethiopia: A cross-sectional study using Multilevel Analysis**  
6  
7  
8  
9

10  
11  
12  
13 Dessie Abebaw Angaw\*<sup>1</sup>, Lemma Derseh Gezie<sup>1</sup>, Berihun Assefa Dachew<sup>1</sup>  
14

15 Address: [dessieabebaw96@gmail.com](mailto:dessieabebaw96@gmail.com), [lemmagezie@gmail.com](mailto:lemmagezie@gmail.com) , [berihunassefa21@gmail.com](mailto:berihunassefa21@gmail.com)  
16

17 Phone number: +251912480696, +251918773355, +251911542348  
18  
19  
20

21 <sup>1</sup>department of Epidemiology and Biostatistics, Institute of Public Health, College of Medicine  
22 and Health Sciences, University of Gondar, Ethiopia  
23  
24  
25  
26  
27

28 **\*Corresponding author**  
29  
30  
31  
32  
33  
34  
35  
36  
37  
38  
39  
40  
41  
42  
43  
44  
45  
46  
47  
48  
49  
50  
51  
52  
53  
54  
55  
56  
57  
58  
59  
60

## ABSTRACT

**Objectives:** Occupational exposure to blood and body fluids is a major risk to transmission of infections for health care workers in developing countries like Ethiopia. The aim of this study was to assess standard precaution practices and its associated factors among health professionals working in Addis Ababa governmental hospitals.

**Methods:** cross-sectional study was conducted on 772 health professionals working in eight government hospitals in Addis Ababa in 2015. Multistage sampling technique was used to select the study participants. Health professionals who were directly participating in screening, diagnosis, treatment and follow up of patients were studied. Standard precaution practices by health professionals were determined by a self-rated response on 30 items with Likert scale response. A respondent would be graded as good compliant for the assessment if he or she scored at least the mean of the total score, or would be considered as poor compliant if scored below it. So as to take into account the hierarchical structure of data, multilevel binary logistic regressions were used. The intra-class correlation coefficient was calculated to evaluate whether the variation in the scores is primarily within or between hospitals.

**Result:** Among health professionals, 50.65% of them had good standard precaution practices. At the individual level, attitude, age and educational status were found to be important factors for standard precaution practice. Controlling individual level factors, applying regular observation (AOR: 1.82; 95% CI: 1.2 to 2.76), providing sufficient materials (AOR: 1.53; 95% CI: 1.03 to 2.28) and weak measure for reported incidences (AOR: 0.49; 95% CI: 0.30 to 0.8) were also hospital level factors associated with standard precaution practices.

**Conclusion:** There was low practice of standard precautions in the health care setting that put patients and health professionals at significant risk of acquiring infections. This finding warrant working on both at hospital and individual level factors that would have significant role to maintain optimal practice.

**Key words:** - Health professionals, multilevel analysis, standard precaution practice

## ARTICLE SUMMARY

### **Strengths and limitations of the study**

- The strength of this study was having large sample size which increases the precision of estimates or estimation power.
- Incorporating factors at two levels, individual and hospital (like referral, general and specialized hospitals), in the Addis Ababa city.
- Applying multilevel model analysis used to avoid atomistic and ecological fallacy.
- The limitation of this study was the possibility of response bias that they were likely to over report their practice and
- The other limitation of this study was using unvalidated tool to measure standard precautions

## BACKGROUND

Standard precaution is the basic minimum standard of hygiene to be applied throughout all contact with blood or body fluids from any patient or source regardless of diagnosis or infection status. Healthcare workers should apply the principles of standard precautions with each encounter with a patient and consider every person, patient or staff, as potentially infectious or susceptible to infection.<sup>(1-4)</sup> It is designed for use in caring for all people, both clients and patients, attending healthcare facilities.<sup>(5-7)</sup> Both those receiving and providing care in a hospital are at risk of acquiring and transmitting infections through exposure to blood, body fluids or contaminated materials.<sup>(8-16)</sup>

Health care workers are exposed to blood and other body fluids while they perform their activities. Among 35 million health workers worldwide, about 3 million receive percutaneous exposures to blood borne pathogens each year; two million of those to HBV, 0.9 million to HCV and 170 000 to HIV. These injuries may result in 15,000 HCV, 70,000 HBV and 500 HIV infections. More than 90% of these infections occur in developing countries.<sup>(17)</sup>

Hospital level factors have a significant impact of occupational exposure on health care professionals. For example, a study done in SaoPaulo revealed that an institutional factor has significant association on standard precaution practices. Eighty eight percent of health professionals those who was supported and got frequent feedback on safety by the institution management had compliance on standard precaution practice with AOR 3.49 compared to poor management support and infrequent feedback on safety practice.<sup>(18)</sup>

1  
2  
3 Adherence to standard precaution practice is the best way to prevent health professionals, patients,  
4 visitors and communities at large from hospital acquired infection and needle stick injuries.(4)  
5  
6 Although minimal data is available on the prevalence of health care acquired infection (HCAI) in  
7  
8 Ethiopian hospitals, in developing countries with health systems and resources similar to Ethiopia,  
9  
10 studies have shown HCAI rates as high as 40%.(4) In Ethiopia, there is dramatic increase in the  
11  
12 development of health facilities, but less emphasis is given for preventing occupational exposures  
13  
14 that still the prevalence is high. For example, a study done in Dire-dawa and Harari in 2010  
15  
16 showed that the prevalence of splashing of blood or body fluids to the mouth or eyes was 28.8%  
17  
18  
19  
20  
21  
22 .(9)

23  
24  
25 Though there are some researches available in Ethiopia on standard precautions practice, (9,19,20)  
26  
27 still they did not address on identifying the factors at individual and hospitals level using a single  
28  
29 analytical framework to provide reliable information. In this context, therefore, real information  
30  
31 from both levels was required to design more effective strategies in increasing health  
32  
33 professionals' compliance of standard precaution practices and to prevent the transmissions of  
34  
35 infectious diseases in the health care setting. Therefore, the aim of the study was to assess standard  
36  
37 precaution practice and its associated factors among health professionals working in Addis Ababa  
38  
39 governmental hospitals, Ethiopia.  
40  
41  
42  
43  
44  
45  
46  
47  
48  
49  
50  
51  
52  
53  
54  
55  
56  
57  
58  
59  
60

## METHODS

### Study setting, study design, participants and sampling procedure

Institutional based cross-sectional study was conducted from March 22 to April 23, 2015 in Addis Ababa governmental hospitals. There were 17 governmental hospitals in Addis Ababa. All health professionals who were working in these hospitals and participating in screening, diagnosis, treatment and follow up of patients were eligible for the study. However, those health professionals who were severely ill to fill the questionnaire were excluded from the study. The sample size was determined by using single population proportion formula with the assumptions of 95% confidence level ( $Z= 1.96$ ), margin of error 5%, proportion 42.9 % ,(19) design effect 2 and 15% non-response rate.(9) With these assumptions, the final sample size was calculated to be 866 health professionals. Because the sampling technique was two stage sampling, first 8 hospitals were selected with simple random sampling technique out of 17 hospitals, and then the health professionals were selected with simple random sampling method after allocating the overall sample size proportionally to the selected hospitals.

### Data collection tools, quality control issues and study variables

A structured questionnaire was adapted from different literatures and Ethiopian Hospital Reform Implementing Guideline (EHRIG) to collect data. Eight BSc nurse data collectors' and two supervisors (health officers) were assigned for data collection using self-administered method.

The questions were first prepared in English language which was translated to Amharic and then back translated to English to keep its consistency. Pretest was conducted on 44 respondents (5% of total sample size) five days before the start of the actual data collection. The pretest was conducted on unselected governmental hospitals (Gandhi and Alert hospitals), and necessary corrections were made on the questionnaire. There was half day training given to data collectors and supervisors focusing on how to collect the data. Before the participants gave their response,



1  
2  
3 orientation was given to them on how to fill the questions. The collected data were checked for  
4  
5 completeness and consistency by the principal investigator and the supervisors.  
6  
7

8  
9 The outcome variable of the study is the overall standard precaution practice by health  
10  
11 professionals and it was measured by 30 questions which were graded by Likert scale responses  
12  
13 on a scale of 0–5 points. The status of standard precaution practice of each participant was  
14  
15 identified by taking the mean of the total score as a cutoff point. Accordingly, those health  
16  
17 professionals who scored less than the mean score value were considered as having poor standard  
18  
19 precaution practice (SPP) and others who scored greater than it was considered as having good  
20  
21 standard precaution practice (SPP).  
22  
23  
24

25  
26 The independent variables considered in the study were individual level variables such as socio-  
27  
28 demographic characteristics, knowledge and attitude of the respondents and hospital level  
29  
30 variables such as frequent observation and hospital category (general, special and referral  
31  
32 hospital). The reliability coefficient for knowledge, attitude, and practice items had a Cronbach's Alpha of  
33  
34 0.732, 0.725 and 0.797, respectively.  
35  
36  
37

38  
39 The respondents were asked 12 Likert's scale questions to measure the attitude of respondents. All  
40  
41 individual answers were computed to determine total scores and to calculate mean. The mean  
42  
43 scores were used to divide the participants into three groups as positive, neutral, and negative  
44  
45 groups. Those participants who scored greater than the mean plus standard deviation (SD) was  
46  
47 considered as having positive attitude, within the interval of mean plus or minus SD as neutral,  
48  
49 and less than mean minus SD as negative attitudes.(21)  
50  
51  
52  
53  
54  
55  
56  
57

## **Patient and Public Involvement**

Patients and the public were not involved in the design and conception of the study and there are no plans to disseminate the results to patients.

## **Data management and analysis**

After appropriate coding, the data were entered into Epi Info version 7 software and exported to Stata version 12 software for analysis. Descriptive analyses were performed using numbers and percentages to show the distribution of the outcome variables by different factors.

Using a two-level binary logistic regression modeling, we examined the effect of a number of individual and hospital level variables. Thus, three different models were constructed for the analysis: the first model is an empty model without any explanatory variable; the second model controlled for the individual-level variables; the third model controlled for both the individual and hospital level variables simultaneously. A p-value of less than 0.05 was used to define statistical significance. The Deviance Information Criterion (DIC) was used as a measure of how well our different models fitted the data. The intra-class correlation coefficient (Rho) was calculated to evaluate whether the variation in the scores is primarily within or between the hospitals.

## **Ethical considerations**

Ethical statement for the study was obtained from the ethical committee of institution of public health, college of medicine and health sciences, and university of Gondar. Official letters were given to the ministry of health, Addis Ababa health office and the selected hospitals. The purpose and significance of the study were explained for each participant; written informed consent was obtained from each study participant before they fill the questionnaire, and participants' involvement was only on a voluntary basis. Participants who were not willing to participate and

1  
2  
3 want to resign at any step of filling the questionnaire were informed to do so without any  
4  
5 restriction. We never wrote the names of participants in the questionnaire, and the confidentiality  
6  
7 of the data has been kept at all level of the study.  
8  
9  
10  
11  
12  
13  
14  
15  
16  
17  
18  
19  
20  
21  
22  
23  
24  
25  
26  
27  
28  
29  
30  
31  
32  
33  
34  
35  
36  
37  
38  
39  
40  
41  
42  
43  
44  
45  
46  
47  
48  
49  
50  
51  
52  
53  
54  
55  
56  
57

For peer review only

## RESULT

### Socio demographic characteristics

A total of 772 study participants were involved in the study with 89.2% response rate. Majority of respondents were nurses (54.4%) and slightly more than half 397 (51.42%) of the respondents were BSc health professionals. The mean (SD) age and work experience of respondents were 29.63 (6.95) and 6.04(6.02) years, respectively (table1).

Table 1: Socio-demographic characteristics of health professionals in Addis Ababa governmental hospitals (n=772), 2015

| Variable                       | Frequency | Percentage |
|--------------------------------|-----------|------------|
| <b>age cat</b>                 |           |            |
| 20-29                          | 400       | 51.81      |
| 30-39                          | 300       | 38.86      |
| 40-49                          | 42        | 5.44       |
| 50-59                          | 30        | 3.89       |
| <b>Sex</b>                     |           |            |
| male                           | 360       | 46.63      |
| female                         | 412       | 53.37      |
| <b>Profession</b>              |           |            |
| Nurse                          | 420       | 54.4       |
| Doctors***                     | 149       | 19.18      |
| Laboratory                     | 69        | 8.94       |
| Health officer                 | 54        | 6.99       |
| midwife                        | 39        | 5.05       |
| Psychiatry                     | 20        | 2.72       |
| Anesthesiology                 | 21        | 2.72       |
| <b>Work experience in year</b> |           |            |
| <1                             | 18        | 2.33       |
| 1-5                            | 457       | 59.2       |
| 6-10                           | 215       | 27.85      |
| >10                            | 82        | 10.62      |
| <b>Marital status</b>          |           |            |
| Married                        | 287       | 37.18      |
| Single                         | 466       | 60.36      |
| others**                       | 19        | 2.46       |

\* Assistance nurse\*\* widowed, separated and divorced . \*\*\* Specialists and medical doctor

### Standard precaution practices

Good standard precaution practice among health professionals working in Addis Ababa hospitals were 50.65 % (95% CI: 46.1, 53.9). About 61.5% (95% CI: 58.3,64.9) of the participants always change gloves between patient contacts and 21.11(95% CI:18.4,23.8) of them always recap used needles. Among standard precaution practice elements, only safe injection management was practiced above fifty percent (50%) (fig.1).

Concerning hand washing practice after any direct contact with patients, 57.6% were practicing it always, 28.24% often, 8.7% some times, 2.9% seldom, and 2.5% respondents were never practicing it. Moreover, only 59.2% of the respondents were always practicing waste disposal on coded waste bin accordingly.

In the intercept model (null model), the result indicated that there was considerable heterogeneity between hospitals. The intra-class correlation in the null model for standard precaution practice indicated that 5.6 % of the total variance can be attributed to differences between hospitals (table2).

Table 2: Parameter coefficients of the null model in using hospital, Addis Ababa (2015)

| Random effect                   | Estimate | 95 % conf. interval |
|---------------------------------|----------|---------------------|
| Level 2 variance - var (cons)   | 0.19*    | (0.055,0.66)        |
| Rho-intra-class correlation (%) | 5.6      |                     |
| Deviance                        | 1052     |                     |

\*significance

In model 3 when both individual level and hospital level variables were added together, health professionals aged 40-49 were more likely to practice standard precautions (OR=2.98; 95% CI=1.05-7.25) when compared to the youngest health professionals, aged 20-29. The odds of practicing standard precaution practice for BSc health professionals were decreased by 38 % when

1  
2  
3 compared to diploma health professionals (OR =0.62; 95% CI; 0.4-0.9). The odds of developing  
4 good Standard precaution practice among health professionals who have positive attitude were  
5  
6 8.12 times higher when compared to health professionals who had negative attitude towards SPP  
7  
8 (table3).  
9  
10  
11  
12

13 On the other hand, attending a specialist level of education which was a significant variable at  
14 individual level when compared to diploma level became a non-significant variable in a model  
15  
16 containing both individual and hospital level variables (table 3).  
17  
18  
19  
20  
21  
22  
23  
24  
25  
26  
27  
28  
29  
30  
31  
32  
33  
34  
35  
36  
37  
38  
39  
40  
41  
42  
43  
44  
45  
46  
47  
48  
49  
50  
51  
52  
53  
54  
55  
56  
57  
58  
59  
60

Table 3: Multilevel multivariable Logistic Regression Modeling of Factors Associated with standard precaution practice among health professionals working in Addis Ababa governmental hospitals, 2015

| Variables                | Model 1 a<br>OR (CI 95%) | Model 2b<br>OR (CI 95%) | Model 3c(full model)<br>OR (CI 95%) |
|--------------------------|--------------------------|-------------------------|-------------------------------------|
| <b>Age category</b>      |                          |                         |                                     |
| 20-29                    |                          | 1                       | 1                                   |
| 30-39                    |                          | 2.00 (1.33-3.02)**      | 1.94 (1.2-2.9)**                    |
| 40-49                    |                          | 3.43 (1.33-8.83)*       | 2.98 (1.05-7.25)*                   |
| 50-59                    |                          | 5.17 (1.56-16.72)**     | 4.57(1.3-15.5)*                     |
| <b>Educational level</b> |                          |                         |                                     |
| Diploma                  |                          | 1                       | 1                                   |
| Degree                   |                          | 0.63 (0.44-0.91) *      | 0.62 (0.4-0.9) *                    |
| Masters                  |                          | 0.46 (0.27-0.78) **     | 0.5(0.27-0.86) *                    |
| Specialist               |                          | 0.19 (0.05-0.76) *      | 0.25(0.06-1.05)                     |
| Others                   |                          | 0.21(0.01-2.54)         | 0.25(0.02-3.4)                      |
| <b>Knowledge</b>         |                          |                         |                                     |
| Poor                     |                          | 1                       | 1                                   |
| Medium                   |                          | 1.4(0.88-2.25)          | 1.47 (0.9-2.3)                      |
| High                     |                          | 1.43(0.85-2.4)          | 1.52(0.9-2.6)                       |
| <b>Attitude</b>          |                          |                         |                                     |
| Negative                 |                          | 1                       | 1                                   |
| Neutral                  |                          | 3.25 (2.02-5.26)***     | 3.04 (1.9-4.96)***                  |
| Positive                 |                          | 8.4(4.46-15.73)***      | 8.12 (4.25-15.53)***                |

Table 3( continued)

**HOSPITAL LEVEL VARIABLE**

Provide safety box and waste bin adequately

Yes 1.01(0.9-1.03)

No 1.0

Measures for reported incidences

Yes 1.0

No 0.49(0.3-0.8) \*\*

Allocate budget for SPP activities

Yes 1.02(0.66-1.57)

No 1.0

Provide materials for SPP activities

Yes 1.5(1.03-2.27)\*

No 1.0

Management give feedback by regular observation

Yes 1.82(1.2-2.74)\*\*

No 1.0

Management give feedback by giving immediate response for problems

Yes 1.45 (0.86-2.40)

No 1.0

Facilitate health professionals and experts to post safety symbols

Yes 0.82 (0.49-1.35)

No 1.0

**Standard of the hospital**

General hospital 1

Specialized hospital 2.35(1.44-3.8)\*

Referral hospital 1.01(0.64-1.58)

**Random effect****Model 1****Model 2****Model 3**

Hospital level variance

**0.19(0.06,0.66)****0.13(0.03,0.57)****0.14(0.03-0.6)****Model fit statistics****Model 1****Model 2****Model 3**

Deviance

1052

958

902

AIC

1055

1002

970

\*P&lt;0.05 \*\* P&lt;0.01 \*\*\* P&lt;0.001

- SPP=standard precaution practice, OR = odd ratio CI= confidence interval, a = there is no independent variable in the model, b= only individual level variables included in the model, c=all level variables included in the model

**DISCUSSION**



1  
2  
3 Our study found that almost half of the health professionals had good standard precaution practice.  
4  
5 The study also revealed that at the individual level, positive attitude, lower educational level and  
6  
7 old age were positively associated with good standard precaution practice. Among hospital level  
8  
9 factors, feedback and regular observation, no response to reported incidences, providing materials  
10  
11 and hospital standards were factors significantly associated with SPP.  
12  
13

14  
15 The prevalence of good standard precaution practice is in line with a study done in Nigeria health  
16  
17 care workers (46.8%) (22) But it is higher than a study done in northern Ethiopia (42.9%).(19)  
18  
19 This difference might be due to variation in attitude of individuals towards standard precaution  
20  
21 practice, regular observation, feedback, working experience and availability of facilities. On the  
22  
23 other hand, our finding is lower than a study done in eastern Ethiopia (80%). The possible  
24  
25 explanation might be due to the different study participants that the eastern Ethiopia study involved  
26  
27 who were both hospital and health center workers. Another possible explanation could be due to  
28  
29 the different data collection tools used.(9)

30  
31 The prevention of potential exposure to blood and other body fluids depend on the type of  
32  
33 procedures and personal protective equipments availability.(4,9) In our study, 61.5% of health  
34  
35 professionals were always changing gloves between patient contacts, and it was lower than a study  
36  
37 done in Nigeria (72.4%).(23,24) The difference between the findings in the two studies may be  
38  
39 due to negligence of health professionals in our study setting and difference in availability of  
40  
41 gloves.

42  
43 The study found out that about 21.1% of the health professionals were recapping used needles  
44  
45 always. This finding is relatively similar to the previous study done in Northern Ethiopia which  
46  
47 was reported as 17 %. (19) Even if our finding was lower than the study done in Nigeria (36.7%),  
48  
49 (22) it is still risky in exposing health professional to infectious diseases like HIV and HBV.

50  
51 Public concern has been growing over the disposal of wastes produced by health care facilities in  
52  
53 the world.(25) The study found that 53.3 % of health professionals never dispose of waste into an  
54  
55 already full receptacle. This poor practice of waste segregation may be due to inadequate  
56  
57 availability of waste bin and negligence of health professionals for their safety.  
58  
59

1  
2  
3 At the individual level, variables like attitude, education and age were found to be important  
4 variables associated with good standard precaution practice. Accordingly, health professionals  
5 who had positive attitude were slightly more than 8 times more likely to develop good SPP as  
6 compared to those respondents who had negative attitude keeping other variables constant. Other  
7 studies also reported the positive association between attitude and good SPP.(26-30)  
8  
9

10  
11  
12 Our study revealed that, practicing standard precaution among degree holders decreased by half as  
13 compared to diploma health professionals. This indicates that better educational attainment had a  
14 negative effect on standard precaution practice. This could be because higher educational level  
15 health professionals may ignore standard precaution practice, or they may give priority to their  
16 patients than their safety. On the other hand, older health professionals had better standard  
17 precaution practice as compared to the youngest group aged 20-29.(31-32) This finding is in  
18 contrast to other similar study (23). The possible explanation may be that the knowledge of the  
19 youngest health professionals may not be supported by skill in our study setting.  
20  
21  
22  
23  
24  
25  
26

27 For those hospitals that did not give response to reported incidents, the odds of developing good  
28 practice by health professional was decreased by 51% as compared to those hospitals which gave  
29 immediate response. The odds of developing standard precaution practice by health professionals  
30 working in a hospital who perform observation with feedback for activities related to SPP was  
31 increased by 82 % as compared to their counterpart. This finding was supported by another similar  
32 study. (18)  
33  
34  
35  
36  
37

38 Health professionals working in hospitals having different characteristics had different practices.  
39 The odds of developing standard precaution practice by health professionals working in  
40 specialized hospital were 2.4 times higher than health professionals working in general hospitals  
41 with the same value of random effect. The possible explanation could be the difference in  
42 availability of materials and burden of acute cases in general hospital. Another explanation could  
43 be the presence of shift in their working place (ward) in the general hospitals which may affect the  
44 strict follow-up of some standard precaution guidelines.  
45  
46  
47  
48  
49  
50

51 The strength of the study may be the large sample size which could increase the estimation power  
52 or precision of estimates, and the use of multilevel analysis which is helpful to avoid atomistic and  
53 ecological fallacy. On the contrary, the limitation of the study was the possibility of response bias  
54  
55  
56  
57

1  
2  
3 that they were likely to over report their practice. Follow up observation of all respondents would  
4 be more accurate and informative to cross check self-reported findings.  
5  
6

7 In conclusion, the standard precaution practice was found to be low in the health care setting that  
8 may increase the likelihood of acquiring the risk of nosocomial infections. Variables like age,  
9 educational status and attitude were factors associated with standard precaution practice at the  
10 individual level, and frequent observation, the absence of measures taken for reported incidences,  
11 providing materials and hospital standards were factors significantly associated with SPP at  
12 hospital level.  
13  
14  
15  
16  
17  
18  
19  
20  
21  
22  
23  
24  
25  
26  
27  
28  
29  
30  
31  
32  
33  
34  
35  
36  
37  
38  
39  
40  
41  
42  
43  
44  
45  
46  
47  
48  
49  
50  
51  
52  
53  
54  
55  
56  
57  
58  
59  
60

### **Competing interest**

No potential conflict of interests with respect to the research, authorship and/or publication of this article.

### **Availability of data and material**

All data generated or analyzed during this study are included in this published article. The data sets used and/or analyzed during the current study are available from the corresponding author on reasonable request

### **Authors' contribution**

DA conceived the study ideas, design, analyzed data and wrote the draft manuscript; LD and BA participated in the study design, edited the manuscript and contributed to the final analysis. All authors read and approved the final manuscript.

### **Authors' Information**

All authors are public health specialists.

### **Acknowledgments**

We would like to thank the University of Gondar for ethical approval. We also like to extend our appreciation to data collectors and the study participants for their devoted cooperation.

### **Funding**

This research work was funded by Amanuel Mental Specialized Hospital and University of Gondar.

### **Ethics approval**

Ethical committee of institution of public health, college of medicine and health science, and university of Gondar

## References

1. Stokes L. Infection Prevention Policy Standard Precautions Policy 2012.
2. Health service executes. Standard precaution guideline. 2009.
3. Katherine H, Murray L. Standard precautions a new approach to reducing infection transmission in the hospital setting. *Journal of intravenous nursing*. 1997;20(65).
4. Minister of Health. Ethiopian hospital reforming implementation guideline 2010.
5. Infection Control Steering Committee. Australian guidelines for the prevention and control of infection in health care. 2010.
6. Elise M. Beltrami, Ian T. Williams, Craig N. Shapiro, Mary E. Chamberland. Risk and Management of Blood-Borne Infections in Health Care Workers. *Clinical microbiology reviews*. 2000, ;13(3).
7. Jane D. Siegel, Emily Rhinehart, Marguerite Jackson, Linda Chiarello. *Guideline for Isolation Precautions: Preventing Transmission of Infectious Agents in Healthcare Settings*. 2007.
8. JHPIEGO. *Infection Prevention Guidelines for Healthcare Facilities with Limited Resources*. 2003.
9. Ayalu A. Reda, Shiferaw Fisseha, Bezatu Mengistie, Jean-Michel Vandeweerd. Standard Precautions: Occupational Exposure and Behavior of Health Care Workers in Ethiopia. *PLoS ONE*. 2010;5(12).
10. Ameneh Barikani. Knowledge, Attitude and Practice towards Standard Isolation Precautions among Iranian Medical Students. *Global Journal of Health Science* 2012;4(2).
11. Enwere OO, Diwe KC. Knowledge, perception and practice of injection safety and healthcare waste management among teaching hospital staff in Southeast Nigeria: an intervention study. *Pan African Medical Journal*. 2014;17(218).

12. Li Li, Chunqing Lin, Zunyou Wu, Jihui Guan, Manhong Jia, Zhihua Yan. HIV-Related Avoidance and Universal Precaution in Medical Settings: Opportunities to Intervene. *Health Services Research* 2011;46(2).
13. TM Foster, MG Lee, CD McGaw, Frankson M. Knowledge and practice of occupational infection control among healthcare workers in Jamaica. *West Indian medical journal* 2010;59(2).
14. J.Farley, C. Tudor, M. Mphahlele†, K. Franz, N. A. Perrin, S. Dorman, et al. A national infection control evaluation of drug-resistant tuberculosis hospitals in South Africa. *NIH Public Access*. 2012 16(1).
15. Eman M.Mortada, Marwa M. Zalat. Assessment of compliance to standard precautions among surgeons in Zagazig University Hospitals, Egypt, using theHealth Belief Model. *Journal of the Arab Society for Medical Research*. 2013;9:6-14.
16. Adinma ED, Ezeama C, Adinma JI, Asuzu MC. Knowledge and practice of universal precautions against blood borne pathogens amongst house officers and nurses in tertiary health institutions in Southeast Nigeria. *NCBI US national library of medicine*. 2009;12(4):398-402.
17. World health organization. *Health care worker safety*. 2005.
18. Adriana Maria da Silva Felix, Elivane Victor, Silmara Elaine Tofano Malaguti, Elucir Gir. Individual, work-related and institutional factors associated with adherence to standard precautions. *Journal of infection control*. 2013;2(2):106-11.
19. Azeb Gebresilassie, Abera Kumei, Dejen Yemane. Standard Precautions Practice among Health Care Workers in Public Health Facilities of Mekelle Special Zone, Northern Ethiopia. *Community Medicine & Health Education*. 2014;4(3).

- 1  
2  
3 20. Berhanu Elfu Feleke. Prevalence and determinant factors for sharp injuries among Addis  
4 Ababa hospital health professionals. *Journal of Public Health*. 2013;1(5):189-93.  
5  
6  
7  
8 21. Najeeb N. Knowledge of standard and transmission based precautions in tertiary and  
9 secondary health care settings of maldavies ,India. 2007.  
10  
11  
12 22. Tobin Ekaete Alice, Asogun Danny Akhere, Odia Ikponwonsa, Ehidihamhen Grace.  
13 Knowledge and practice of infection control among health workers in a tertiary hospital in Edo  
14 state,Nigeria. *Direct Research Journal of Health and Pharmacology (DRJHP)*. 2013;1 (2):20-  
15 7.  
16  
17  
18  
19  
20  
21 23. OE Amoran, OO Onwube. Infection Control and Practice of Standard Precautions Among  
22 Healthcare Workers in Northern Nigeria. *Journal of infectious disease* 2013;5(4):156-63.  
23  
24  
25 24. Stephen Obekpa Abah, Elijah Ige Ohimain. Healthcare waste management in Nigeria: A case  
26 study. *Journal of Public Health and Epidemiology*. 2011;3(3):99-110.  
27  
28  
29  
30 25. World health organization. Safe management of wastes from healthcare activities. 2014.  
31  
32  
33 26. Kandis V. Garland, . A Survey of United States Dental Hygienists' Knowledge, Attitudes, and  
34 Practices with Infection Control Guidelines. *The Journal of Dental Hygiene*. 2013;87(3).  
35  
36  
37 27. Mukherjee S, Bhattacharyya A, SharmaSarkar B, Goswami DN, Ghosh S, Samanta A.  
38 Knowledge and Practice of Standard Precautions and Awareness Regarding Post-Exposure  
39 Prophylaxis for HIV among Interns of a Medical College in West Bengal, India. *Oman Medical*  
40 *Journal* 2013;28(2):141-5.  
41  
42  
43  
44  
45  
46 28. Ramesh holla, tanuj kanchan, nithin kumar, bunnikrishnan, rekhat, prasanna mithra, et al.  
47 Perception and practice of standard precautions among health care professionals at tertiary care  
48 hospitals in coastal South India. *Asian J Pharm Clin Res*. 2014;7(2):101-4.  
49  
50  
51  
52  
53  
54  
55  
56  
57  
58  
59  
60

- 1  
2  
3 29. Beghdadli, Belhadj Z, Chabane W, Ghomari O, Kandouci ABF, anello S. Standard  
4 "precautions" practices among nurses in a university hospital in Western Algeria. US national  
5 library of medicine. 2008;20(5).  
6  
7  
8  
9  
10 30. Ministry of Health Malaysia. Policies And Procedures for Infection Control 2010.  
11  
12 31. Alice TE, Akhere AD, Ikponwonsa O, Grace E. Knowledge and practice of infection control  
13 among health workers in a tertiary hospital in Edo state, Nigeria. Direct research journal of  
14 health and Pharmacology. 2013 Nov;1(2):20-7.  
15  
16  
17  
18  
19 32. Gichuhi AW, Kamau SM, Nyangena E, Otieno-Ayayo ZN. Health care workers adherence to  
20 infection prevention practices and control measures: A case of a level four district hospital in  
21 Kenya. American journal of nursing science. 2015;4(2):39-44.  
22  
23  
24  
25  
26  
27  
28  
29  
30  
31  
32  
33  
34  
35  
36  
37  
38  
39  
40  
41  
42  
43  
44  
45  
46  
47  
48  
49  
50  
51  
52  
53  
54  
55  
56  
57  
58  
59  
60



1  
2  
3  
4  
5  
6  
7  
8  
9  
10  
11  
12  
13  
14  
15  
16  
17  
18  
19  
20  
21  
22  
23  
24  
25  
26  
27  
28  
29  
30  
31  
32  
33  
34  
35  
36  
37  
38  
39  
40  
41  
42  
43  
44  
45  
46  
47  
48  
49  
50  
51  
52  
53  
54  
55  
56  
57  
58  
59  
60

Figure

Figure 1 percentage of standard precaution practices among health professionals working Addis Ababa governmental hospitals, 2015

For peer review only

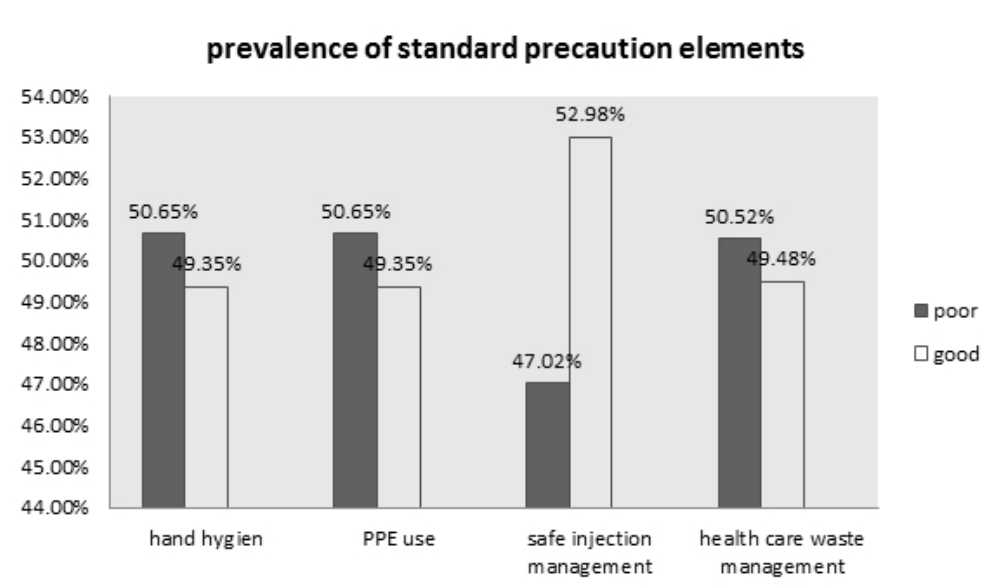

25  
26  
27  
28  
29

Figure 1 percentage of standard precaution practices among health professionals working Addis Ababa governmental hospitals, 2015

152x88mm (96 x 96 DPI)

## STROBE Statement—checklist of items that should be included in reports of observational studies

|                              | Item No. | Recommendation                                                                                                                                                                             | Page No. | Relevant text from manuscript |
|------------------------------|----------|--------------------------------------------------------------------------------------------------------------------------------------------------------------------------------------------|----------|-------------------------------|
| <b>Title and abstract</b>    | 1        | (a) Indicate the study's design with a commonly used term in the title or the abstract                                                                                                     | 1        |                               |
|                              |          | (b) Provide in the abstract an informative and balanced summary of what was done and what was found                                                                                        | 2&3      |                               |
| <b>Introduction</b>          |          |                                                                                                                                                                                            |          |                               |
| Background/rationale         | 2        | Explain the scientific background and rationale for the investigation being reported                                                                                                       | 4&5      |                               |
| Objectives                   | 3        | State specific objectives, including any prespecified hypotheses                                                                                                                           | 5        |                               |
| <b>Methods</b>               |          |                                                                                                                                                                                            |          |                               |
| Study design                 | 4        | Present key elements of study design early in the paper                                                                                                                                    | 6        |                               |
| Setting                      | 5        | Describe the setting, locations, and relevant dates, including periods of recruitment, exposure, follow-up, and data collection                                                            | 6        |                               |
| Participants                 | 6        | (a) <i>Cohort study</i> —Give the eligibility criteria, and the sources and methods of selection of participants. Describe methods of follow-up                                            | 6        |                               |
|                              |          | <i>Case-control study</i> —Give the eligibility criteria, and the sources and methods of case ascertainment and control selection. Give the rationale for the choice of cases and controls |          |                               |
|                              |          | <i>Cross-sectional study</i> —Give the eligibility criteria, and the sources and methods of selection of participants                                                                      |          |                               |
|                              |          | (b) <i>Cohort study</i> —For matched studies, give matching criteria and number of exposed and unexposed                                                                                   |          |                               |
|                              |          | <i>Case-control study</i> —For matched studies, give matching criteria and the number of controls per case                                                                                 |          |                               |
| Variables                    | 7        | Clearly define all outcomes, exposures, predictors, potential confounders, and effect modifiers. Give diagnostic criteria, if applicable                                                   | 7        |                               |
| Data sources/<br>measurement | 8*       | For each variable of interest, give sources of data and details of methods of assessment (measurement). Describe comparability of assessment methods if there is more than one group       | 6&7      |                               |
| Bias                         | 9        | Describe any efforts to address potential sources of bias                                                                                                                                  | 6        |                               |
| Study size                   | 10       | Explain how the study size was arrived at                                                                                                                                                  | 6        |                               |

Continued on next page

|                        |     |                                                                                                                                                                                                                                                                                                           |       |
|------------------------|-----|-----------------------------------------------------------------------------------------------------------------------------------------------------------------------------------------------------------------------------------------------------------------------------------------------------------|-------|
| Quantitative variables | 11  | Explain how quantitative variables were handled in the analyses. If applicable, describe which groupings were chosen and why                                                                                                                                                                              | 7&8   |
| Statistical methods    | 12  | (a) Describe all statistical methods, including those used to control for confounding                                                                                                                                                                                                                     | 8     |
|                        |     | (b) Describe any methods used to examine subgroups and interactions                                                                                                                                                                                                                                       |       |
|                        |     | (c) Explain how missing data were addressed                                                                                                                                                                                                                                                               |       |
|                        |     | (d) <i>Cohort study</i> —If applicable, explain how loss to follow-up was addressed<br><i>Case-control study</i> —If applicable, explain how matching of cases and controls was addressed<br><i>Cross-sectional study</i> —If applicable, describe analytical methods taking account of sampling strategy |       |
|                        |     | (e) Describe any sensitivity analyses                                                                                                                                                                                                                                                                     |       |
| <b>Results</b>         |     |                                                                                                                                                                                                                                                                                                           |       |
| Participants           | 13* | (a) Report numbers of individuals at each stage of study—eg numbers potentially eligible, examined for eligibility, confirmed eligible, included in the study, completing follow-up, and analysed                                                                                                         | 9     |
|                        |     | (b) Give reasons for non-participation at each stage                                                                                                                                                                                                                                                      |       |
|                        |     | (c) Consider use of a flow diagram                                                                                                                                                                                                                                                                        |       |
| Descriptive data       | 14* | (a) Give characteristics of study participants (eg demographic, clinical, social) and information on exposures and potential confounders                                                                                                                                                                  | 9&10  |
|                        |     | (b) Indicate number of participants with missing data for each variable of interest                                                                                                                                                                                                                       |       |
|                        |     | (c) <i>Cohort study</i> —Summarise follow-up time (eg, average and total amount)                                                                                                                                                                                                                          |       |
| Outcome data           | 15* | <i>Cohort study</i> —Report numbers of outcome events or summary measures over time                                                                                                                                                                                                                       | 9&10  |
|                        |     | <i>Case-control study</i> —Report numbers in each exposure category, or summary measures of exposure                                                                                                                                                                                                      |       |
|                        |     | <i>Cross-sectional study</i> —Report numbers of outcome events or summary measures                                                                                                                                                                                                                        |       |
| Main results           | 16  | (a) Give unadjusted estimates and, if applicable, confounder-adjusted estimates and their precision (eg, 95% confidence interval). Make clear which confounders were adjusted for and why they were included                                                                                              | 12&13 |
|                        |     | (b) Report category boundaries when continuous variables were categorized                                                                                                                                                                                                                                 |       |
|                        |     | (c) If relevant, consider translating estimates of relative risk into absolute risk for a meaningful time period                                                                                                                                                                                          |       |

Continued on next page

1  
2  
3  
4  
5  
6  
7  
8  
9  
10  
11  
12  
13  
14  
15  
16  
17  
18  
19  
20  
21  
22  
23  
24  
25  
26  
27  
28  
29  
30  
31  
32  
33  
34  
35  
36  
37  
38  
39  
40  
41  
42  
43  
44  
45  
46

|                          |    |                                                                                                                                                                            |       |
|--------------------------|----|----------------------------------------------------------------------------------------------------------------------------------------------------------------------------|-------|
| Other analyses           | 17 | Report other analyses done—eg analyses of subgroups and interactions, and sensitivity analyses                                                                             |       |
| <b>Discussion</b>        |    |                                                                                                                                                                            |       |
| Key results              | 18 | Summarise key results with reference to study objectives                                                                                                                   | 14&15 |
| Limitations              | 19 | Discuss limitations of the study, taking into account sources of potential bias or imprecision. Discuss both direction and magnitude of any potential bias                 | 15&16 |
| Interpretation           | 20 | Give a cautious overall interpretation of results considering objectives, limitations, multiplicity of analyses, results from similar studies, and other relevant evidence | 14&15 |
| Generalisability         | 21 | Discuss the generalisability (external validity) of the study results                                                                                                      | 16    |
| <b>Other information</b> |    |                                                                                                                                                                            |       |
| Funding                  | 22 | Give the source of funding and the role of the funders for the present study and, if applicable, for the original study on which the present article is based              | 17    |

\*Give information separately for cases and controls in case-control studies and, if applicable, for exposed and unexposed groups in cohort and cross-sectional studies.

**Note:** An Explanation and Elaboration article discusses each checklist item and gives methodological background and published examples of transparent reporting. The STROBE checklist is best used in conjunction with this article (freely available on the Web sites of PLoS Medicine at <http://www.plosmedicine.org/>, Annals of Internal Medicine at <http://www.annals.org/>, and Epidemiology at <http://www.epidem.com/>). Information on the STROBE Initiative is available at [www.strobe-statement.org](http://www.strobe-statement.org).

# BMJ Open

## Standard Precaution Practice and Associated Factors among Health Professionals Working in Addis Ababa Governmental Hospitals, Ethiopia: A cross-sectional study using Multilevel Analysis

|                                 |                                                                                                                                                                                                                                                                                                                                                                                                                                                                                                                   |
|---------------------------------|-------------------------------------------------------------------------------------------------------------------------------------------------------------------------------------------------------------------------------------------------------------------------------------------------------------------------------------------------------------------------------------------------------------------------------------------------------------------------------------------------------------------|
| Journal:                        | <i>BMJ Open</i>                                                                                                                                                                                                                                                                                                                                                                                                                                                                                                   |
| Manuscript ID                   | bmjopen-2019-030784.R2                                                                                                                                                                                                                                                                                                                                                                                                                                                                                            |
| Article Type:                   | Research                                                                                                                                                                                                                                                                                                                                                                                                                                                                                                          |
| Date Submitted by the Author:   | 17-Sep-2019                                                                                                                                                                                                                                                                                                                                                                                                                                                                                                       |
| Complete List of Authors:       | Angaw, Dessie ; Institute of public health,college of medicine and health science , University of Gondar,Ethiopia, Department of Epidemiology and Bio statistics<br>Gezie, Lemma Derseh; Institute of Public Health, College of Medicine and Health Sciences, University of Gondar, Ethiopia, Department of Epidemiology and Biostatistics<br>Dachew, Berihun; Institute of Public Health, College of Medicine and Health Sciences, University of Gondar, Ethiopia, Department of Epidemiology and Bio statistics |
| <b>Primary Subject Heading</b>: | Health services research                                                                                                                                                                                                                                                                                                                                                                                                                                                                                          |
| Secondary Subject Heading:      | Infectious diseases                                                                                                                                                                                                                                                                                                                                                                                                                                                                                               |
| Keywords:                       | EPIDEMIOLOGY, Health & safety < HEALTH SERVICES ADMINISTRATION & MANAGEMENT, Health policy < HEALTH SERVICES ADMINISTRATION & MANAGEMENT                                                                                                                                                                                                                                                                                                                                                                          |
|                                 |                                                                                                                                                                                                                                                                                                                                                                                                                                                                                                                   |

SCHOLARONE™  
Manuscripts

1  
2  
3 **Standard Precaution Practice and Associated Factors among Health**  
4 **Professionals Working in Addis Ababa Governmental Hospitals,**  
5 **Ethiopia: A cross-sectional study using Multilevel Analysis**  
6  
7  
8  
9

10  
11  
12  
13 Dessie Abebaw Angaw\*<sup>1</sup>, Lemma Derseh Gezie<sup>1</sup>, Berihun Assefa Dachew<sup>1</sup>

14  
15 Address: [dessieabebaw96@gmail.com](mailto:dessieabebaw96@gmail.com), [lemmagezie@gmail.com](mailto:lemmagezie@gmail.com) , [berihunassefa21@gmail.com](mailto:berihunassefa21@gmail.com)

16  
17 Phone number: +251912480696, +251918773355, +251911542348  
18  
19

20  
21 <sup>1</sup>department of Epidemiology and Biostatistics, Institute of Public Health, College of Medicine  
22 and Health Sciences, University of Gondar, Ethiopia  
23  
24

25  
26  
27  
28 **\*Corresponding author**  
29  
30  
31  
32  
33  
34  
35  
36  
37  
38  
39  
40  
41  
42  
43  
44  
45  
46  
47  
48  
49  
50  
51  
52  
53  
54  
55  
56  
57  
58  
59  
60

## ABSTRACT

**Objectives:** Occupational exposure to blood and body fluids is a major risk factor for the transmission of infections to health professionals in developing countries like Ethiopia. The aim of this study was to assess standard precaution practices and its associated factors among health professionals working at Addis Ababa government hospitals.

**Methods:** A cross-sectional study was conducted on 772 health professionals working at eight government hospitals in Addis Ababa, 2015. The multistage sampling technique was used to select study participants. Health professionals who were directly participating in screening, diagnosis, treatment and follow ups of patients were studied. Standard precaution practices by health professionals were determined by a self-rated response to 30 item Likert scale response. A respondent would be graded as “good” compliant for the assessment if they scored at least the mean of the total score, or would be considered as poor compliant if they scored less. To take the hierarchical structure of the data into account during analysis, multilevel binary logistic regressions were used. The intra-class correlation coefficient was calculated to evaluate whether variations in score were primarily within or between hospitals.

**Result:** Out of the participants, 50.65% had good standard precaution practices. At the individual level, attitude, age and educational status were found to be important factors of standard precaution practices. Controlling individual level factors, applying regular observations (AOR:1.82;95%CI:1.2 to2.76), providing sufficient materials (AOR:1.53;95% CI:1.03to 2.28) and weak measures on reported incidences (AOR:0.49;95% CI: 0.30 to 0.8) were also hospital level factors associated with standard precaution practices.

**Conclusion:** standard precaution practices in the health care facilities were found to be so low that both patients and health professionals were at a significant risk for infections. The finding suggests the need for optimizing individual and hospital level precautionary practices.

**Key words:** - Health professionals, multilevel analysis, standard precaution practice



## ARTICLE SUMMARY

### **Strengths and limitations of the study**

- The strength of this study was having large sample size which increases the precision of estimates or estimation power.
- Incorporating factors at two levels, individual and hospital (like referral, general and specialized hospitals), in the Addis Ababa city.
- Applying multilevel model analysis used to avoid atomistic and ecological fallacy.
- The limitation of this study was the possibility of response bias that they were likely to over report their practice and
- The other limitation of this study was using unvalidated tool to measure standard precautions

## BACKGROUND

Standard precaution is the basic minimum standard of hygiene to be applied throughout all contact with blood or body fluids from any patient or source regardless of diagnosis or infection status. Health professionals should apply the principles of standard precautions at each encounter with a patient and consider every person, patient or staff as potentially infectious or susceptible to infection.<sup>(1-4)</sup> The practice has been designed for use in caring for all people, both clients and patients, attending healthcare facilities.<sup>(5-7)</sup> Both recipients and providers of care in a hospital are at risk for acquiring and transmitting infections through exposure to blood, body fluids or contaminated materials.<sup>(8-16)</sup>

Health professionals are exposed to blood and other body fluids while they are performing their activities. Out of 35 million health professionals worldwide, about 3 million receive percutaneous exposures to blood borne pathogens each year; two million of them to hepatitis B virus (HBV), 0.9 million to hepatitis C virus (HCV), and 170 000 to Human Immune-deficiency Virus (HIV). These injuries may result in 15,000 HCV, 70,000 HBV and 500 HIV infections. More than 90% of these infections are known to occur in developing countries. <sup>(17)</sup>

Hospital level factors have a significant impact on the occupational exposure of health professionals. For example, a study done in SaoPaulo revealed that an institutional factor had significant association with standard precaution practices. Health professionals who got support and frequent feedback on safety practice by the institutional managements had more than threefold compliance with standard precaution practices when compared to those who didn't get such support and feedback.<sup>(18)</sup>

1  
2  
3 Adherence to standard precaution practices is the best way of preventing health professionals,  
4 patients, visitors and communities at large from hospital acquired infections and needle stick  
5 injuries.(4) Although only minimal data has been available on the prevalence of health care  
6 acquired infections (HCAI) in Ethiopian hospitals, in developing countries with health systems  
7 and resources similar to Ethiopia, studies have shown as high as 40% HCAI rates.(4) In Ethiopia,  
8 there has been dramatic increase in the development of health facilities, but the emphasis given  
9 to preventing occupational exposures has been inadequate despite its high prevalence. For  
10 instance, a study done in Dire Dawa and Harari in 2010 showed that the prevalence of splashing  
11 of blood or body fluids to the mouth or eyes was 28.8% .(9)

12  
13  
14  
15  
16  
17  
18  
19  
20  
21  
22  
23  
24  
25 There were some studies on standard precaution practices done in Ethiopia; (9,19,20) however,  
26 the available studies did not address the problem of identifying factors at individual and hospital  
27 levels using a single analytical framework to provide reliable information. In this context,  
28 therefore, reliable information from both levels was required to design more effective strategies  
29 for increasing health professionals' compliance with standard precaution practices and for  
30 preventing the transmissions of infectious diseases in health care settings. Therefore, the aim of  
31 this study was to assess standard precaution practice and its associated factors among health  
32 professionals working at Addis Ababa government hospitals, Ethiopia.

## METHODS

### Study setting, study design, participants and sampling procedure

Institutional based cross-sectional study was conducted from March 22 to April 23, 2015 in Addis Ababa governmental hospitals. There were 17 governmental hospitals in Addis Ababa. All health professionals who were working in the hospitals and participating in screening, diagnosis, treatment and follow up of patients were eligible for the study. However, those health professionals who were severely ill to fill the questionnaire were excluded from the study.

The sample size was determined by using single population proportion formula with the assumptions of 95% confidence level ( $Z= 1.96$ ), margin of error 5%, proportion 42.9 % ,(19) design effect 2, and 15% non-response rate; (9) with these assumptions, the final sample size was calculated to be 866 health professionals. Because the sample selection procedure was two-stage sampling technique, first 8 hospitals were selected with simple random sampling technique out of 17 hospitals, and then the health professionals were selected with simple random sampling method after allocating the overall sample size proportionally to the selected hospitals.

### Data collection tools, quality control issues and study variables

A structured questionnaire was adapted from different literatures and Ethiopian Hospital Reform Implementing Guideline (EHRIG) to collect data. Eight BSc nurse data collectors and two supervisors (health officers) were assigned for data collection using self-administered method.

The questions were first prepared in English language which was translated to Amharic and then back translated to English to keep its consistency. Pretest was conducted on 44 respondents (5% of total sample size) five days before the start of the actual data collection. The pretest was conducted on unselected governmental hospitals (Gandhi and Alert hospitals), and necessary corrections were made on the questionnaire. There was half day training given to data collectors and supervisors focusing on how to collect the data. Before the participants gave their response,

1  
2  
3 orientation was given to them on how to fill the questions. The collected data were checked for  
4  
5 completeness and consistency by the principal investigator and the supervisors.  
6  
7

8  
9 The outcome variable of the study was the overall standard precaution practice by health  
10 professionals and it was measured by 30 questions which were graded by Likert scale responses  
11 on a scale of 0–5 points. The status of standard precaution practice of each participant was  
12 identified by taking the mean of the total score as a cutoff point. Accordingly, the health  
13 professionals who scored less than the mean score value were considered as having poor standard  
14 precaution practice (SPP) and others who scored greater than the mean score value were considered as  
15 having good SPP.  
16  
17  
18  
19  
20

21 The independent variables considered in the study were individual level variables such as socio-  
22 demographic characteristics, knowledge and attitude of the respondents and hospital level  
23 variables such as frequent observation and hospital category (general, special and referral  
24 hospital). The reliability coefficient for knowledge, attitude, and practice items had a Cronbach's Alpha  
25 of 0.732, 0.725 and 0.797, respectively.  
26  
27  
28  
29

30 The respondents were asked 12 Likert's scale questions to measure the attitude of respondents.  
31  
32 All responses of participants were computed to determine total scores and to calculate mean. The  
33 mean score was used to divide the participants into three groups as positive, neutral, and negative  
34 groups. Those participants who scored greater than the mean plus standard deviation (SD) was  
35 considered as having positive attitude, within the interval of mean plus or minus SD as neutral,  
36 and less than mean minus SD as negative attitudes. (21)  
37  
38  
39  
40  
41  
42  
43  
44

### 45 **Patient and Public Involvement**

46  
47 Patients and the public were not involved in the design and conception of the study and there are  
48 no plans to disseminate the results to patients.  
49  
50  
51  
52  
53  
54  
55  
56  
57

## Data management and analysis

After appropriate coding, the data were entered into Epi Info version 7 software and exported to Stata version 12 software for analysis. Descriptive analyses were performed using numbers and percentages to show the distribution of the outcome variables by different factors.

Using a two-level binary logistic regression modeling, we examined the effect of a number of individual and hospital level variables. Thus, three different models were constructed for the analysis: the first model is an empty model without any explanatory variable; the second model controlled for the individual-level variables; the third model controlled for both the individual and hospital level variables simultaneously. A  $p$ -value of less than 0.05 was used to define statistical significance. The Deviance Information Criterion (DIC) was used as a measure of how well our different models fitted the data. The intra-class correlation coefficient (Rho) was calculated to evaluate whether the variation in the scores is primarily within or between the hospitals.

## Ethical considerations

Ethical statement for the study was obtained from the ethical committee of institution of public health, college of medicine and health sciences, and university of Gondar. Official letters were given to the ministry of health, Addis Ababa health office and the selected hospitals. The purpose and significance of the study were explained for each participant. Written informed consent was obtained from each study participant before they fill the questionnaire, and participants' involvement was only on a voluntary basis. Participants who were not willing to participate and want to resign at any step of filling the questionnaire were informed to do so without any restriction. We never wrote the names of participants in the questionnaire, and the confidentiality of the data has been kept at all level of the study.

## RESULT

### Socio demographic characteristics

A total of 772 participants were involved in the study with 89.2% response rate. The majority (54.4%) of the respondents were nurses and slightly more than half, i.e. 397 (51.42%) of the respondents were BSc health professionals. The mean (SD) age and work experience of respondents were 29.63 (6.95) and 6.04(6.02) years, respectively (Table1).

Table 1: Socio-demographic characteristics of health professionals in Addis Ababa governmental hospitals (n=772), 2015

| Variable                       | Frequency | Percentage |
|--------------------------------|-----------|------------|
| <b>age cat</b>                 |           |            |
| 20-29                          | 400       | 51.81      |
| 30-39                          | 300       | 38.86      |
| 40-49                          | 42        | 5.44       |
| 50-59                          | 30        | 3.89       |
| <b>Sex</b>                     |           |            |
| male                           | 360       | 46.63      |
| female                         | 412       | 53.37      |
| <b>Profession</b>              |           |            |
| Nurse                          | 420       | 54.4       |
| Doctors***                     | 149       | 19.18      |
| Laboratory                     | 69        | 8.94       |
| Health officer                 | 54        | 6.99       |
| midwife                        | 39        | 5.05       |
| Psychiatry                     | 20        | 2.72       |
| Anesthesiology                 | 21        | 2.72       |
| <b>Work experience in year</b> |           |            |
| <1                             | 18        | 2.33       |
| 1-5                            | 457       | 59.2       |
| 6-10                           | 215       | 27.85      |
| >10                            | 82        | 10.62      |
| <b>Marital status</b>          |           |            |
| Married                        | 287       | 37.18      |
| Single                         | 466       | 60.36      |
| others**                       | 19        | 2.46       |

\* Assistance nurse\*\* widowed, separated and divorced . \*\*\* Specialists and medical doctor

### Standard precaution practices

Good standard precaution practice among health professionals working at Addis Ababa hospitals was 50.65 % (95% CI: 46.1, 53.9). About 61.5% (95% CI: 58.3,64.9) of the participants always changed gloves between patient contacts, and 21.11(95% CI:18.4,23.8) of them always recapped used needles. Out of the standard precaution practice elements, only safe injection management was practiced above fifty percent (50%) (Fig.1).

Out of the participants, 57.6, 28.4, 8.7,2.9 and 2.5% washed their hands always, often, sometimes, seldom and never respectively, after any direct contact with patients. Moreover, only 59.2% of the respondents always disposed waste in coded bins accordingly.

In the intercept model (null model), the result indicated that there was considerable heterogeneity among hospitals. The intra-class correlation in the null model for standard precaution practices indicated that 5.6 % of the total variance could be attributed to differences among hospitals (Table2).

Table 2: Parameter coefficients of the null model in using hospital, Addis Ababa (2015)

| Random effect                   | Estimate | 95 % conf. interval |
|---------------------------------|----------|---------------------|
| Level 2 variance - var (cons)   | 0.19*    | (0.055, 0.66)       |
| Rho-intra-class correlation (%) | 5.6      |                     |
| Deviance                        | 1052     |                     |

\*significance



1  
2  
3 In model 3, when both individual and hospital level variables were added together, health  
4 professionals aged 40-49 were more likely to practice standard precautions (OR=2.98; 95% CI:  
5 1.05-7.25) than the younger health professionals, aged 20-29. The odds of practicing standard  
6 precaution practice for BSc health professionals were decreased by 38 % when compared with  
7 diploma health professionals (OR = 0.62; 95% CI: 0.4-0.9). The odds of developing good  
8 standard precaution practices among health professionals who had positive attitude were 8.12  
9 times higher compared to health professionals who had negative attitude towards SPP (Table3).

10  
11  
12 On the other hand, a speciality level education which was a significant variable at individual  
13 level when compared to diploma level training became a non-significant variable in a model  
14 containing both individual and hospital level variables (Table 3).  
15  
16  
17  
18  
19  
20  
21  
22  
23  
24  
25  
26  
27  
28  
29  
30  
31  
32  
33  
34  
35  
36  
37  
38  
39  
40  
41  
42  
43  
44  
45  
46  
47  
48  
49  
50  
51  
52  
53  
54  
55  
56  
57  
58  
59  
60

Table 3: Multilevel multivariable logistic regression modeling of factors associated with standard precaution practice among health professionals working in Addis Ababa governmental hospitals, 2015

| Variables                | Model 1 a<br>OR (CI 95%) | Model 2b<br>OR (CI 95%) | Model 3c(full model)<br>OR (CI 95%) |
|--------------------------|--------------------------|-------------------------|-------------------------------------|
| <b>Age category</b>      |                          |                         |                                     |
| 20-29                    |                          | 1                       | 1                                   |
| 30-39                    |                          | 2.00 (1.33-3.02)**      | 1.94 (1.2-2.9)**                    |
| 40-49                    |                          | 3.43 (1.33-8.83)*       | 2.98 (1.05-7.25)*                   |
| 50-59                    |                          | 5.17 (1.56-16.72)**     | 4.57(1.3-15.5)*                     |
| <b>Educational level</b> |                          |                         |                                     |
| Diploma                  |                          | 1                       | 1                                   |
| Degree                   |                          | 0.63 (0.44-0.91) *      | 0.62 (0.4-0.9) *                    |
| Masters                  |                          | 0.46 (0.27-0.78) **     | 0.5(0.27-0.86) *                    |
| Specialist               |                          | 0.19 (0.05-0.76) *      | 0.25(0.06-1.05)                     |
| Others                   |                          | 0.21(0.01-2.54)         | 0.25(0.02-3.4)                      |
| <b>Knowledge</b>         |                          |                         |                                     |
| Poor                     |                          | 1                       | 1                                   |
| Medium                   |                          | 1.4(0.88-2.25)          | 1.47 (0.9-2.3)                      |
| High                     |                          | 1.43(0.85-2.4)          | 1.52(0.9-2.6)                       |
| <b>Attitude</b>          |                          |                         |                                     |
| Negative                 |                          | 1                       | 1                                   |
| Neutral                  |                          | 3.25 (2.02-5.26)***     | 3.04 (1.9-4.96)***                  |
| Positive                 |                          | 8.4(4.46-15.73)***      | 8.12 (4.25-15.53)***                |

Table 3( continued)

**HOSPITAL LEVEL VARIABLE**

Provide safety box and waste bin adequately

Yes 1.01(0.9-1.03)

No 1.0

Measures for reported incidences

Yes 1.0

No 0.49(0.3-0.8) \*\*

Allocate budget for SPP activities

Yes 1.02(0.66-1.57)

No 1.0

Provide materials for SPP activities

Yes 1.5(1.03-2.27)\*

No 1.0

Management give feedback by regular observation

Yes 1.82(1.2-2.74)\*\*

No 1.0

Management give feedback by giving immediate response for problems

Yes 1.45 (0.86-2.40)

No 1.0

Facilitate health professionals and experts to post safety symbols

Yes 0.82 (0.49-1.35)

No 1.0

**Standard of the hospital**

General hospital 1

Specialized hospital 2.35(1.44-3.8)\*

Referral hospital 1.01(0.64-1.58)

**Random effect****Model 1****Model 2****Model 3**

Hospital level variance

**0.19(0.06,0.66)****0.13(0.03,0.57)****0.14(0.03-0.6)****Model fit statistics****Model 1****Model 2****Model 3**

Deviance

1052

958

902

AIC

1055

1002

970

\*P&lt;0.05 \*\* P&lt;0.01 \*\*\* P&lt;0.001

- SPP=standard precaution practice, OR = odd ratio CI= confidence interval, a = there is no independent variable in the model, b= only individual level variables included in the model, c=all level variables included in the model

## DISCUSSION

Our study found that almost half of the health professionals had good standard precaution practice. The study also revealed that positive attitude, low educational level and old age were positively associated with good standard precaution practices at the individual level. Among hospital level factors, feedback and regular observations, no response to reported incidences, provision of materials and hospital standards were significantly associated with standard precaution practices

The prevalence of good standard precaution practice noted in this work is in line with that of a study done among Nigerian health professionals (46.8%).<sup>(22)</sup> But it is higher than the result of a study done in northern Ethiopia (42.9%).<sup>(19)</sup> The difference might be due to variations in the attitude of individuals towards standard precaution practices, regular observations, feedback, work experience and availability of facilities. On the other hand, our finding is lower than that of a study done in eastern Ethiopia (80%). The possible explanation might be due to the different study participants in that the eastern Ethiopia study involved who were both hospital and health center workers. Another possible explanation could be differences in the data collection tools used.<sup>(9)</sup>

The prevention of potential exposure to blood and other body fluids depends on the type of procedures and personal protective equipment available.<sup>(4,9)</sup> In our study, 61.5% of the health professionals always changed gloves between patient contacts, but that was lower than a study done in Nigeria (72.4%).<sup>(23,24)</sup> The variations between the findings of the two studies may be due to the negligence of health professionals in our study setting and differences in the availability of gloves.

This study found out that about 21.1% of the health professionals always recapped used needles. This finding is relatively similar to that of a previous study done in northern Ethiopia and reported 17%.<sup>(19)</sup> Although our finding was lower than that of Nigeria (36.7%),<sup>(22)</sup> it was still capable of exposing health professional to infectious diseases like HIV and HBV.

1  
2  
3 Public concern has been growing over the disposal of wastes produced by health care facilities in  
4 the world. (25) The study found that 53.3 % of health professionals never disposed of waste into  
5 the already full receptacles. This poor practice of waste segregation may be due to inadequate  
6 availability of waste bins and the negligence of health professionals for their safety.  
7  
8  
9

10  
11 At the individual level, attitude, education and age were found to be important variables  
12 associated with good standard precaution practices. Thus, health professionals who had positive  
13 attitude were slightly more than 8 times more likely to develop good standard precaution  
14 practices compared to respondents who had negative attitude keeping other variables constant.  
15 Other studies also reported the positive association between attitude and good standard  
16 precaution practice. (26-30)  
17  
18  
19  
20  
21

22 Our study revealed that practicing standard precaution among degree holders decreased by half  
23 compared to diploma health professionals. This indicates that better educational attainment had a  
24 negative effect on standard precaution practice. This could be because more educated health  
25 professionals may ignore standard precaution practices, or they may give priority to their patients  
26 than their safety. On the other hand, older health professionals had better standard precaution  
27 practice compared to the younger groups, aged 20-29 years. (31-32) This finding is dissimilar to  
28 that of another similar study.(23) The possible explanation may be that the knowledge of the  
29 younger health professionals in our study setting might not be supported by adequate skills.  
30  
31  
32  
33  
34  
35  
36

37 For hospitals which did not respond to reported incidents, the odds of developing good practice  
38 by health professionals decreased by 51% compared to hospitals which acted immediately. The  
39 odds of developing standard precaution practices for health professionals working at hospitals  
40 and performing observations with feedback on activities relating to such practices increased by  
41 82% compared to their counterparts. This finding was of course supported by another similar  
42 study. (18)  
43  
44  
45  
46  
47

48 Health professionals working at hospitals with their different characteristics had different  
49 practices. The odds of developing standard precaution practices for health professionals working  
50 at specialized hospitals were 2.4 times higher than for health professionals working at general  
51 hospitals with the same value of random effect. The possible explanation could be differences in  
52 the availability of materials and the burden of acute cases at such hospitals. Another explanation  
53  
54  
55  
56  
57

1  
2  
3 could be work in shifts at the general hospitals which may affect the strict follow-up of some  
4 standard precaution guidelines.  
5

6  
7 The strength of the study may be the large sample size which could have increased estimation  
8 power or the precision of estimates. Our use of a multilevel analysis which helps to avoid  
9 atomistic and ecological fallacies is another strength; the measurement of the effect of factors  
10 from both individual and hospital levels on SPP is also an attempt to address the gap we  
11 identified. (9, 19, 20) To the contrary, the limitation of the study was the possibility of response  
12 bias as participants were likely to over report their practices. Follow up observations of all  
13 respondents would help to cross-check self-reported data.  
14  
15  
16  
17  
18  
19

20 In conclusion, standard precaution practices are so low that there is an obvious likelihood of  
21 acquiring the risk for nosocomial infections. Variables like age, educational status and attitude  
22 were factors associated with standard precaution practices at the individual level, while lack of  
23 frequent observations, the absence of measures to cope with reported incidents, poor provision of  
24 materials and hospital standards were factors significantly associated with standard precaution  
25 practice at hospital levels.  
26  
27  
28  
29  
30  
31  
32  
33  
34  
35  
36  
37  
38  
39  
40  
41  
42  
43  
44  
45  
46  
47  
48  
49  
50  
51  
52  
53  
54  
55  
56  
57  
58  
59  
60

### **Competing interest**

No potential conflict of interests with respect to the research, authorship and/or publication of this article.

### **Availability of data and material**

All data generated or analyzed during this study are included in this published article. The data sets used and/or analyzed during the current study are available from the corresponding author on reasonable request

### **Authors' contribution**

DA conceived the study ideas, design, analyzed data and wrote the draft manuscript; LD and BA participated in the study design, edited the manuscript and contributed to the final analysis. All authors read and approved the final manuscript.

### **Authors' Information**

All authors are public health specialists.

### **Acknowledgments**

We would like to thank the University of Gondar for ethical approval. We also like to extend our appreciation to data collectors and the study participants for their devoted cooperation.

### **Funding**

There are no funders to report for this submission

### **Ethics approval**

Ethical committee of institution of public health, college of medicine and health science, and university of Gondar

## References

1. Stokes L. Infection Prevention Policy Standard Precautions Policy 2012.
2. Health service executes. Standard precaution guideline. 2009.
3. Katherine H, Murray L. Standard precautions a new approach to reducing infection transmission in the hospital setting. *Journal of intravenous nursing*. 1997;20(65).
4. Minister of Health. Ethiopian hospital reforming implementation guideline 2010.
5. Infection Control Steering Committee. Australian guidelines for the prevention and control of infection in health care. 2010.
6. Elise M. Beltrami, Ian T. Williams, Craig N. Shapiro, Mary E. Chamberland. Risk and Management of Blood-Borne Infections in Health Care Workers. *Clinical microbiology reviews*. 2000, ;13(3).
7. Jane D. Siegel, Emily Rhinehart, Marguerite Jackson, Linda Chiarello. Guideline for Isolation Precautions: Preventing Transmission of Infectious Agents in Healthcare Settings. 2007.
8. JHPIEGO. Infection Prevention Guidelines for Healthcare Facilities with Limited Resources. 2003.
9. Ayalu A. Reda, Shiferaw Fisseha, Bezatu Mengistie, Jean-Michel Vandeweerd. Standard Precautions: Occupational Exposure and Behavior of Health Care Workers in Ethiopia. *PLoS ONE*. 2010;5(12).
10. Ameneh Barikani. Knowledge, Attitude and Practice towards Standard Isolation Precautions among Iranian Medical Students. *Global Journal of Health Science* 2012;4(2).



- 1  
2  
3 11. Enwere OO, Diwe KC. Knowledge, perception and practice of injection safety and  
4 healthcare waste management among teaching hospital staff in Southeast Nigeria: an  
5 intervention study. *Pan African Medical Journal*. 2014;17(218).  
6  
7
- 8  
9  
10 12. Li Li, Chunqing Lin, Zunyou Wu, Jihui Guan, Manhong Jia, Zhihua Yan. HIV-Related  
11 Avoidance and Universal Precaution in Medical Settings: Opportunities to Intervene. *Health  
12 Services Research*2011;46(2).  
13  
14
- 15  
16  
17 13. TM Foster, MG Lee, CD McGaw, Frankson M. Knowledge and practice of occupational  
18 infection control among healthcare workers in Jamaica. *West Indian medical journal*  
19 2010;59(2).  
20  
21
- 22  
23  
24 14. J.Farley, C. Tudor, M. Mphahlele†, K. Franz, N. A. Perrin, S. Dorman, et al. A national  
25 infection control evaluation of drug-resistant tuberculosis hospitals in South Africa. *NIH  
26 Public Access*. 2012 16(1).  
27  
28
- 29  
30  
31 15. Eman M.Mortada, Marwa M. Zalat. Assessment of compliance to standard precautions  
32 among surgeons in Zagazig University Hospitals, Egypt, using theHealth Belief Model.  
33 *Journal of the Arab Society for Medical Research*. 2013;9:6-14.  
34  
35
- 36  
37  
38 16. Adinma ED, Ezeama C, Adinma JI, Asuzu MC. Knowledge and practice of universal  
39 precautions against blood borne pathogens amongst house officers and nurses in tertiary  
40 health institutions in Southeast Nigeria. *NCBI US national library of medicine*.  
41 2009;12(4):398-402.  
42  
43
- 44  
45  
46 17. World health organization. Health care worker safety. 2005.  
47  
48
- 49  
50  
51 18. Adriana Maria da Silva Felix, Elivane Victor, Silmara Elaine Tofano Malaguti, Elucir Gir.  
52 Individual, work-related and institutional factors associated with adherence to standard  
53 precautions. *Journal of infection control*. 2013;2(2):106-11.  
54  
55

19. Azeb Gebresilassie, Abera Kumei, Dejen Yemane. Standard Precautions Practice among Health Care Workers in Public Health Facilities of Mekelle Special Zone, Northern Ethiopia. *Community Medicine & Health Education*. 2014;4(3).
20. Berhanu Elfu Feleke. Prevalence and determinant factors for sharp injuries among Addis Ababa hospital health professionals. *Journal of Public Health*. 2013;1(5):189-93.
21. Najeeb N. Knowledge of standard and transmission based precautions in tertiary and secondary health care settings of maldavies ,India. 2007.
22. Tobin Ekaete Alice, Asogun Danny Akhere, Odia Ikponwonsa, Ehidiamhen Grace. Knowledge and practice of infection control among health workers in a tertiary hospital in Edo state,Nigeria. *Direct Research Journal of Health and Pharmacology (DRJHP)*. 2013;1(2):20-7.
23. OE Amoran, OO Onwube. Infection Control and Practice of Standard Precautions Among Healthcare Workers in Northern Nigeria. *Journal of infectious disease* 2013;5(4):156-63.
24. Stephen Obekpa Abah, Elijah Ige Ohimain. Healthcare waste management in Nigeria: A case study. *Journal of Public Health and Epidemiology*. 2011;3(3):99-110.
25. World health organization. Safe management of wastes from healthcare activities. 2014.
26. Kandis V. Garland, . A Survey of United States Dental Hygienists' Knowledge, Attitudes, and Practices with Infection Control Guidelines. *The Journal of Dental Hygiene*. 2013;87(3).
27. Mukherjee S, Bhattacharyya A, SharmaSarkar B, Goswami DN, Ghosh S, Samanta A. Knowledge and Practice of Standard Precautions and Awareness Regarding Post-Exposure Prophylaxis for HIV among Interns of a Medical College in West Bengal, India. *Oman Medical Journal* 2013;28(2):141-5.

- 1  
2  
3 28. Ramesh holla, tanuj kanchan, nithin kumar, bunnikrishnan, rekhat, prasanna mithra, et al.  
4 Perception and practice of standard precautions among health care professionals at tertiary  
5 care hospitals in coastal South India. *Asian J Pharm Clin Res.* 2014;7(2):101-4.  
6  
7  
8  
9  
10 29. Beghdadli, Belhadj Z, Chabane W, Ghomari O, Kandouci ABF, anello S. Standard  
11 precautions" practices among nurses in a university hospital in Western Algeria. *US national*  
12 *library of medicine.* 2008;20(5).  
13  
14  
15  
16  
17 30. Ministry of Health Malaysia. Policies And Procedures for Infection Control 2010.  
18  
19 31. Alice TE, Akhere AD, Ikponwonsa O, Grace E. Knowledge and practice of infection control  
20 among health workers in a tertiary hospital in Edo state, Nigeria. *Direct research journal of*  
21 *health and Pharmacology.* 2013 Nov;1(2):20-7.  
22  
23  
24  
25  
26 32. Gichuhi AW, Kamau SM, Nyangena E, Otieno-Ayayo ZN. Health care workers adherence to  
27 infection prevention practices and control measures: A case of a level four district hospital in  
28 Kenya. *American journal of nursing science.* 2015;4(2):39-44.  
29  
30  
31  
32  
33  
34  
35  
36  
37  
38  
39  
40  
41  
42  
43  
44  
45  
46  
47  
48  
49  
50  
51  
52  
53  
54  
55  
56  
57  
58  
59  
60

1  
2  
3  
4  
5  
6 Figure  
7  
8

9 Figure 1 percentage of standard precaution practices among health professionals working Addis  
10 Ababa governmental hospitals, 2015  
11  
12  
13  
14  
15  
16  
17  
18  
19  
20  
21  
22  
23  
24  
25  
26  
27  
28  
29  
30  
31  
32  
33  
34  
35  
36  
37  
38  
39  
40  
41  
42  
43  
44  
45  
46  
47  
48  
49  
50  
51  
52  
53  
54  
55  
56  
57

For peer review only

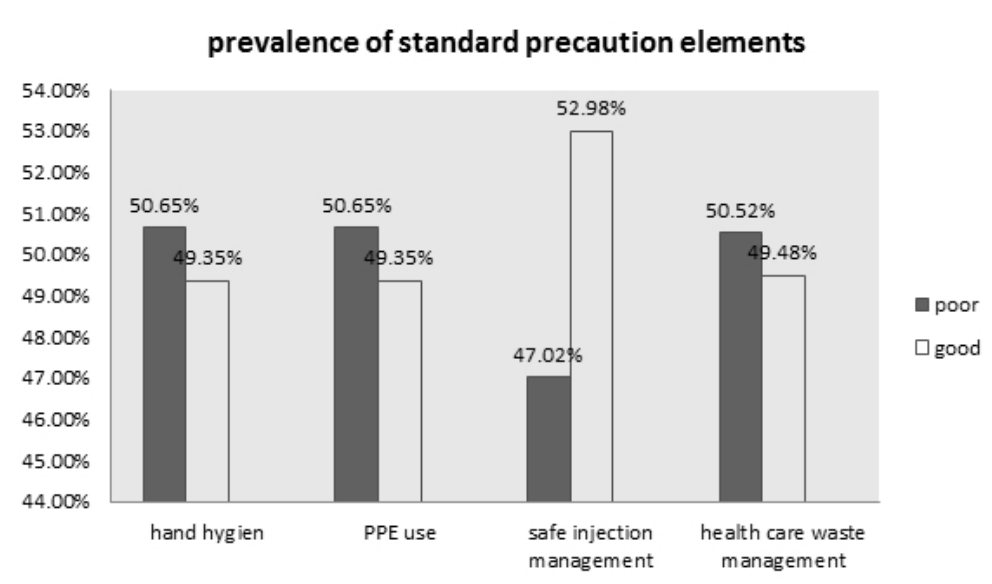

Figure 1 percentage of standard precaution practices among health professionals working Addis Ababa governmental hospitals, 2015

152x88mm (96 x 96 DPI)

## STROBE Statement—checklist of items that should be included in reports of observational studies

|                              | Item No.                                                                                                              | Recommendation                                                                                                                                                                             | Page No. | Relevant text from manuscript |
|------------------------------|-----------------------------------------------------------------------------------------------------------------------|--------------------------------------------------------------------------------------------------------------------------------------------------------------------------------------------|----------|-------------------------------|
| <b>Title and abstract</b>    | 1                                                                                                                     | (a) Indicate the study's design with a commonly used term in the title or the abstract                                                                                                     | 1        |                               |
|                              |                                                                                                                       | (b) Provide in the abstract an informative and balanced summary of what was done and what was found                                                                                        | 2&3      |                               |
| <b>Introduction</b>          |                                                                                                                       |                                                                                                                                                                                            |          |                               |
| Background/rationale         | 2                                                                                                                     | Explain the scientific background and rationale for the investigation being reported                                                                                                       | 4&5      |                               |
| Objectives                   | 3                                                                                                                     | State specific objectives, including any prespecified hypotheses                                                                                                                           | 5        |                               |
| <b>Methods</b>               |                                                                                                                       |                                                                                                                                                                                            |          |                               |
| Study design                 | 4                                                                                                                     | Present key elements of study design early in the paper                                                                                                                                    | 6        |                               |
| Setting                      | 5                                                                                                                     | Describe the setting, locations, and relevant dates, including periods of recruitment, exposure, follow-up, and data collection                                                            | 6        |                               |
| Participants                 | 6                                                                                                                     | (a) <i>Cohort study</i> —Give the eligibility criteria, and the sources and methods of selection of participants. Describe methods of follow-up                                            | NA       |                               |
|                              |                                                                                                                       | <i>Case-control study</i> —Give the eligibility criteria, and the sources and methods of case ascertainment and control selection. Give the rationale for the choice of cases and controls | NA       |                               |
|                              | <i>Cross-sectional study</i> —Give the eligibility criteria, and the sources and methods of selection of participants | 6                                                                                                                                                                                          |          |                               |
|                              | (b) <i>Cohort study</i> —For matched studies, give matching criteria and number of exposed and unexposed              | NA                                                                                                                                                                                         |          |                               |
|                              |                                                                                                                       | <i>Case-control study</i> —For matched studies, give matching criteria and the number of controls per case                                                                                 | NA       |                               |
| Variables                    | 7                                                                                                                     | Clearly define all outcomes, exposures, predictors, potential confounders, and effect modifiers. Give diagnostic criteria, if applicable                                                   | 7        |                               |
| Data sources/<br>measurement | 8*                                                                                                                    | For each variable of interest, give sources of data and details of methods of assessment (measurement). Describe comparability of assessment methods if there is more than one group       | 6&7      |                               |
| Bias                         | 9                                                                                                                     | Describe any efforts to address potential sources of bias                                                                                                                                  | 6        |                               |
| Study size                   | 10                                                                                                                    | Explain how the study size was arrived at                                                                                                                                                  | 6        |                               |

Continued on next page

|                        |     |                                                                                                                                                                                                              |       |
|------------------------|-----|--------------------------------------------------------------------------------------------------------------------------------------------------------------------------------------------------------------|-------|
| Quantitative variables | 11  | Explain how quantitative variables were handled in the analyses. If applicable, describe which groupings were chosen and why                                                                                 | 7&8   |
| Statistical methods    | 12  | (a) Describe all statistical methods, including those used to control for confounding                                                                                                                        | 8     |
|                        |     | (b) Describe any methods used to examine subgroups and interactions                                                                                                                                          | NA    |
|                        |     | (c) Explain how missing data were addressed                                                                                                                                                                  | NA    |
|                        |     | (d) <i>Cohort study</i> —If applicable, explain how loss to follow-up was addressed                                                                                                                          | NA    |
|                        |     | <i>Case-control study</i> —If applicable, explain how matching of cases and controls was addressed                                                                                                           | NA    |
|                        |     | <i>Cross-sectional study</i> —If applicable, describe analytical methods taking account of sampling strategy                                                                                                 | NA    |
|                        |     | (e) Describe any sensitivity analyses                                                                                                                                                                        | NA    |
| <b>Results</b>         |     |                                                                                                                                                                                                              |       |
| Participants           | 13* | (a) Report numbers of individuals at each stage of study—eg numbers potentially eligible, examined for eligibility, confirmed eligible, included in the study, completing follow-up, and analysed            | 9     |
|                        |     | (b) Give reasons for non-participation at each stage                                                                                                                                                         | NA    |
|                        |     | (c) Consider use of a flow diagram                                                                                                                                                                           | NA    |
| Descriptive data       | 14* | (a) Give characteristics of study participants (eg demographic, clinical, social) and information on exposures and potential confounders                                                                     | 9&10  |
|                        |     | (b) Indicate number of participants with missing data for each variable of interest                                                                                                                          | NA    |
|                        |     | (c) <i>Cohort study</i> —Summarise follow-up time (eg, average and total amount)                                                                                                                             | NA    |
| Outcome data           | 15* | <i>Cohort study</i> —Report numbers of outcome events or summary measures over time                                                                                                                          | NA    |
|                        |     | <i>Case-control study</i> —Report numbers in each exposure category, or summary measures of exposure                                                                                                         | NA    |
|                        |     | <i>Cross-sectional study</i> —Report numbers of outcome events or summary measures                                                                                                                           | 9&10  |
| Main results           | 16  | (a) Give unadjusted estimates and, if applicable, confounder-adjusted estimates and their precision (eg, 95% confidence interval). Make clear which confounders were adjusted for and why they were included | 12&13 |
|                        |     | (b) Report category boundaries when continuous variables were categorized                                                                                                                                    | 7     |
|                        |     | (c) If relevant, consider translating estimates of relative risk into absolute risk for a meaningful time period                                                                                             | NA    |

Continued on next page

|                          |    |                                                                                                                                                                            |       |
|--------------------------|----|----------------------------------------------------------------------------------------------------------------------------------------------------------------------------|-------|
| Other analyses           | 17 | Report other analyses done—eg analyses of subgroups and interactions, and sensitivity analyses                                                                             | NA    |
| <b>Discussion</b>        |    |                                                                                                                                                                            |       |
| Key results              | 18 | Summarise key results with reference to study objectives                                                                                                                   | 14&15 |
| Limitations              | 19 | Discuss limitations of the study, taking into account sources of potential bias or imprecision. Discuss both direction and magnitude of any potential bias                 | 15&16 |
| Interpretation           | 20 | Give a cautious overall interpretation of results considering objectives, limitations, multiplicity of analyses, results from similar studies, and other relevant evidence | 14&15 |
| Generalisability         | 21 | Discuss the generalisability (external validity) of the study results                                                                                                      | 16    |
| <b>Other information</b> |    |                                                                                                                                                                            |       |
| Funding                  | 22 | Give the source of funding and the role of the funders for the present study and, if applicable, for the original study on which the present article is based              | 17    |

\*Give information separately for cases and controls in case-control studies and, if applicable, for exposed and unexposed groups in cohort and cross-sectional studies.

**Note:** An Explanation and Elaboration article discusses each checklist item and gives methodological background and published examples of transparent reporting. The STROBE checklist is best used in conjunction with this article (freely available on the Web sites of PLoS Medicine at <http://www.plosmedicine.org/>, Annals of Internal Medicine at <http://www.annals.org/>, and Epidemiology at <http://www.epidem.com/>). Information on the STROBE Initiative is available at [www.strobe-statement.org](http://www.strobe-statement.org).
